# Supplementary material
Source: PubMed Central journal article supplement (PMC6487913)

## Supplementary Online Content

Wang Y, Zhou S, Yang F, et al. Treatment-related adverse events of PD-1 and PD-L1 inhibitors in clinical trials: a systematic review and meta-analysis. *JAMA Oncol*. Published online April 25, 2019. doi:10.1001/jamaoncol.2019.0393

**eTable 1.** List of the Studies Included in This Meta-Analysis

**eTable 2.** Relative Ratios of Grade 3 or Higher Adverse Event Incidences to Respective All-grade Adverse Event Incidences

**eTable 3.** List of Studies That Reported At Least One Treatment-related Death

**eFigure 1.** Incidences of All Adverse Events, (A) Incidences of All-grade Adverse Events and (B) Incidences of Grade 3 or Higher Adverse Events

**eFigure 2.** Mean Incidences of Adverse Events by Study, (A) Mean Incidences of All-grade Adverse Events by Study and (B) Mean Incidences of Grade 3 or Higher Adverse Events by Study

**eFigure 3.** Heterogeneity of Adverse Event Incidence in This Meta-Analysis

**eFigure 4.** Mean Incidences of All-grade Adverse Events by Study if Ignoring Missing Data

This supplementary material has been provided by the authors to give readers additional information about their work.

**eTable 1. List of the Studies Included in This Meta-Analysis**

| Study                      | Ref | Phase | NCT number | Trial name or ID | Cancer type           | cancer type category | Total Patient number | Dosing schedule | Patient number | Patients with any grade AEs | Patients with grade 3 or higher AEs | Note on AE report criteria                 |
|----------------------------|-----|-------|------------|------------------|-----------------------|----------------------|----------------------|-----------------|----------------|-----------------------------|-------------------------------------|--------------------------------------------|
| <b>Nivolumab</b>           |     |       |            |                  |                       |                      |                      |                 |                |                             |                                     |                                            |
| 2010-Brahmer-J Clin Oncol  | 6   | 1     | 00441337   | CA209-001        | Advanced solid tumors | Mixed cancer types   | 33                   | 1 mg/kg Q4W     | 6              |                             |                                     | Treatment-related/ Drug-related; Grade ≥ 2 |
|                            |     |       |            |                  |                       |                      |                      | 3 mg/kg Q4W     | 6              |                             |                                     | Treatment-related/ Drug-related; Grade ≥ 2 |
|                            |     |       |            |                  |                       |                      |                      | 10 mg/kg Q4W    | 21             |                             |                                     | Treatment-related/ Drug-related; Grade ≥ 2 |
| 2012-Topalian-N Engl J Med | 7   | 1     | 00730639   | CA209-003        | Advanced tumors       | Mixed cancer types   | 259                  | 1 mg/kg Q2W     | 79             | 39                          | 5                                   | Treatment-related; ≥ 1% All patients       |
|                            |     |       |            |                  |                       |                      |                      | 3 mg/kg Q2W     | 50             | 19                          | 2                                   | Treatment-related; ≥ 1% All patients       |
|                            |     |       |            |                  |                       |                      |                      | 10 mg/kg Q2W    | 130            | 50                          | 11                                  | Treatment-related; ≥ 1% All patients       |
| 2014-Topalian-J Clin Oncol | 8   | 1     | 00730639   | CA209-003        | Melanoma              | Melanoma             | 72                   | 1 mg/kg Q2W     | 35             | 34                          | 5                                   | Treatment-related; ≥ 3%                    |

|                             |    |   |           |               |                   |                        |     |                    |     |     |    |                                                                         |
|-----------------------------|----|---|-----------|---------------|-------------------|------------------------|-----|--------------------|-----|-----|----|-------------------------------------------------------------------------|
|                             |    |   |           |               |                   |                        |     |                    |     |     |    | All patients                                                            |
|                             |    |   |           |               |                   |                        |     | 3 mg/kg Q2W        | 17  | 15  | 6  | Treatment-related; ≥ 3% All patients                                    |
|                             |    |   |           |               |                   |                        |     | 10 mg/kg Q2W       | 20  | 14  | 5  | Treatment-related; ≥ 3% All patients                                    |
| 2015-Ansell-N Engl J Med    | 9  | 1 | 0159 2370 | CA209-039     | Hodgkin lymphoma  | Hematologic malignancy | 23  | 3 mg/kg Q2W        | 23  | 18  | 5  | Drug-related in ≥ 5% All patients ; Drug-related serious adverse events |
| 2015-Borghaei-N Engl J Med  | 10 | 3 | 0167 3867 | CheckMate 057 | Nonsquamous NSCLC | Lung cancer            | 287 | 3 mg/kg Q2W        | 287 | 199 | 30 | Treatment-related; ≥ 10% Patients treated with Nivolumab or Docetaxel   |
| 2015-Brahmer-N Engl J Med   | 11 | 3 | 0164 2004 | CheckMate 017 | Squamous NSCLC    | Lung cancer            | 131 | 3 mg/kg Q2W        | 131 | 76  | 9  | Treatment-related; ≥ 5% Patients treated with Nivolumab or Docetaxel    |
| 2015-Gettinger-J Clin Oncol | 12 | 1 | 0073 0639 | CA209-003     | NSCLC             | Lung cancer            | 129 | 1, 3, 10 mg/kg Q2W | 129 | 53  | 6  | Treatment-related select (with potential                                |

|                             |    |   |          |              |         |              |    |              |    |    |   |                                                                               |
|-----------------------------|----|---|----------|--------------|---------|--------------|----|--------------|----|----|---|-------------------------------------------------------------------------------|
|                             |    |   |          |              |         |              |    |              |    |    |   | immunologic etiologies that require more frequent monitoring or intervention) |
|                             |    |   |          |              |         |              |    | 1 mg/kg Q2W  | 33 | 21 | 5 | Treatment-related; ≥ 3% All patients                                          |
|                             |    |   |          |              |         |              |    | 3 mg/kg Q2W  | 37 | 25 | 5 | Treatment-related; ≥ 3% All patients                                          |
|                             |    |   |          |              |         |              |    | 10 mg/kg Q2W | 59 | 45 | 8 | Treatment-related; ≥ 3% All patients                                          |
| 2015-Hamanishi-J Clin Oncol | 13 | 2 |          | UMIN00005714 | Ovarian | Other cancer | 20 | 1 mg/kg Q2W  | 10 | 9  | 4 | Treatment-related of special interest ; ≥ 20% All patients                    |
|                             |    |   |          |              |         |              |    | 3 mg/kg Q2W  | 10 | 10 | 4 | Treatment-related of special interest ; ≥ 20% All patients                    |
| 2015-McDermott-J Clin Oncol | 14 | 1 | 00730639 | CA209-003    | RCC     | GU cancer    | 34 | 1 mg/kg Q2W  | 18 | 15 | 2 | Treatment-related; ≥ 3% All patients                                          |
|                             |    |   |          |              |         |              |    | 10 mg/kg Q2W | 16 | 14 | 4 | Treatment-                                                                    |

|                               |        |         |              |                  |          |                |         |              |         |     |    |                                                                                                                        |                                     |
|-------------------------------|--------|---------|--------------|------------------|----------|----------------|---------|--------------|---------|-----|----|------------------------------------------------------------------------------------------------------------------------|-------------------------------------|
|                               |        |         |              |                  |          |                |         |              |         |     |    |                                                                                                                        | related;<br>≥ 3%<br>All<br>patients |
| 2015-Motzer-N<br>Engl J Med   | 1<br>5 | 3       | 0166<br>8784 | CheckMate<br>025 | RCC      | GU<br>cancer   | 40<br>6 | 3 mg/kg Q2W  | 40<br>6 | 319 | 76 | Treatm<br>ent-<br>related;<br>≥ 10%<br>Patient<br>s<br>treated<br>with<br>Nivolu<br>mab or<br>Everoli<br>mus           |                                     |
| 2015-Motzer-J Clin<br>Oncol   | 1<br>6 | 2       | 0135<br>4431 | CA209-010        | RCC      | GU<br>cancer   | 54      | 10 mg/kg Q3W | 54      | 42  | 7  | Treatm<br>ent-<br>related<br>in ≥<br>10%<br>Patient<br>s in any<br>group;<br>Potenti<br>al immun<br>e-<br>mediat<br>ed |                                     |
| 2015-Rizvi-Lancet<br>Oncol    | 1<br>7 | 2       | 0172<br>1759 | CheckMate<br>063 | NSCLC    | Lung<br>cancer | 11<br>7 | 3 mg/kg Q2W  | 11<br>7 | 87  | 20 | Treatm<br>ent-<br>related,<br>≥ 5%<br>All<br>patients                                                                  |                                     |
| 2015-Robert-N<br>Engl J Med   | 1<br>8 | 3       | 0172<br>1772 | CheckMate<br>066 | Melanoma | Melanom<br>a   | 20<br>6 | 3 mg/kg Q2W  | 20<br>6 | 153 | 24 | Treatm<br>ent-<br>related;<br>≥ 2%<br>Patient<br>s in<br>either<br>group                                               |                                     |
| 2016-Antonia-<br>Lancet Oncol | 1<br>9 | 1/<br>2 | 0192<br>8394 | CheckMate<br>032 | SCLC     | Lung<br>cancer | 98      | 3 mg/kg Q2W  | 98      | 52  | 13 | Treatm<br>ent-<br>related;<br>≥ 10%<br>Patient<br>s in any<br>cohort<br>(Grade<br>1-2)<br>and all<br>events            |                                     |

|                               |    |   |          |  |     |           |    |                                  |    |    |    | (Grade 3-4)                                                                                                                                                  |
|-------------------------------|----|---|----------|--|-----|-----------|----|----------------------------------|----|----|----|--------------------------------------------------------------------------------------------------------------------------------------------------------------|
| 2016-Choueiri-Clin Cancer Res | 20 | 3 | 01358721 |  | RCC | GU cancer | 69 | 2 mg/kg Q3W, Previously Treated  | 22 | 22 | 8  | Treatment-related; ≥ 15% Patients in all treatment groups (any grade) and ≥ 2 patients in any treatment group (select AEs with potential immunologic causes) |
|                               |    |   |          |  |     |           |    | 10 mg/kg Q3W, Previously Treated | 23 | 23 | 13 | Treatment-related; ≥ 15% Patients in all treatment groups (any grade) and ≥ 2 patients in any treatment group (select AEs with potential immunologic causes) |
|                               |    |   |          |  |     |           |    | 10 mg/kg Q3W, Treatment-naïve    | 24 | 24 | 12 | Treatment-related; ≥ 15%                                                                                                                                     |

|                                |        |    |              |                  |                         |                                   |         |                  |         |     |    |  |  |  |  |  |  |  |  |  |                                                                                                                                                                                                      |
|--------------------------------|--------|----|--------------|------------------|-------------------------|-----------------------------------|---------|------------------|---------|-----|----|--|--|--|--|--|--|--|--|--|------------------------------------------------------------------------------------------------------------------------------------------------------------------------------------------------------|
|                                |        |    |              |                  |                         |                                   |         |                  |         |     |    |  |  |  |  |  |  |  |  |  | Patient<br>s in all<br>treatme<br>nt<br>groups<br>(any<br>grade)<br>and ≥ 2<br>patients<br>in any<br>treatme<br>nt<br>group<br>(select<br>AEs<br>with<br>potenti<br>al<br>immun<br>ologic<br>causes) |
| 2016-Ferris-N Engl<br>J Med    | 2<br>1 | 3  | 0210<br>5636 | CheckMate<br>141 | Head and neck carcinoma | Other<br>cancer                   | 23<br>6 | 3 mg/kg Q2W      | 23<br>6 | 139 | 31 |  |  |  |  |  |  |  |  |  | Treatm<br>ent-<br>related;<br>≥ 5%<br>Patient<br>s in<br>either<br>group                                                                                                                             |
| 2016-Gettinger-J<br>Clin Oncol | 2<br>2 | 1  | 0145<br>4102 |                  | NSCLC                   | Lung<br>cancer                    | 52      | 3 mg/kg Q2W      | 52      | 37  | 10 |  |  |  |  |  |  |  |  |  | Treatm<br>ent-<br>related;<br>≥ 5%<br>All<br>Patient<br>s;<br>Combin<br>ed with<br>treatme<br>nt-<br>related<br>irAEs                                                                                |
| 2016-Lesokhin-J<br>Clin Oncol  | 2<br>3 | 1b | 0159<br>2370 |                  | Hematologic malignancy  | Hematolo<br>gic<br>malignanc<br>y | 81      | 1 or 3 mg/kg Q2W | 81      | 53  | 17 |  |  |  |  |  |  |  |  |  | Drug-<br>related;<br>≥ 5%<br>Patient<br>s (any<br>grade)<br>and all<br>events<br>(grade<br>≥ 3);<br>Combin<br>ed with<br>drug-                                                                       |

|                            |     |     |          |                |                          |              |     |             |     |     |    |                                                                                     |
|----------------------------|-----|-----|----------|----------------|--------------------------|--------------|-----|-------------|-----|-----|----|-------------------------------------------------------------------------------------|
|                            |     |     |          |                |                          |              |     |             |     |     |    | related irAEs                                                                       |
| 2016-Sharma-Lancet Oncol   | 2/4 | 1/2 | 01928394 | CheckMate 032  | Urothelial carcinoma     | GU cancer    | 78  | 3 mg/kg Q2W | 78  | 63  | 17 | Treatment-related; ≥ 10% Patients (any grade) and all events (grade 3-4)            |
| 2016-Weber-Cancer Immu Res | 2/5 | 1/2 | 01176461 | CA209-006/007  | Melanoma                 | Melanoma     | 61  | 3 mg/kg Q2W | 61  |     |    | Drug-related; Any irAEs or > 5% of total patients                                   |
| 2017-Ben-Ami-Cancer        | 2/6 | 2   | 02428192 | NCI-2014-02403 | Uterus leiomyosarcoma    | Other cancer | 12  | 3 mg/kg Q2W | 12  |     | 9  | All grade ≥ 3 AEs including unrelated, possible, probable, definite related to drug |
| 2017-Carbone-N Engl J Med  | 2/7 | 3   | 02041533 | CheckMate 026  | NSCLC                    | Lung cancer  | 267 | 3 mg/kg Q2W | 267 | 190 | 47 | Treatment-related; ≥ 10% Patients in either group                                   |
| 2017-El-Khoueiry-Lancet    | 2/8 | 1/2 | 01658878 | CheckMate 040  | Hepatocellular carcinoma | GI cancer    | 33  | 1 mg/kg Q2W | 10  | 8   | 5  | Treatment-related; ≥ 5% of all patients, any grade                                  |
|                            |     |     |          |                |                          |              |     | 3 mg/kg Q2W | 10  | 9   | 2  | Treatment-related; ≥ 5% of all patients                                             |





|                                |        |   |              |                 |                      |                        |         |             |         |     |    |                                                                          |
|--------------------------------|--------|---|--------------|-----------------|----------------------|------------------------|---------|-------------|---------|-----|----|--------------------------------------------------------------------------|
|                                |        |   |              |                 |                      |                        |         |             |         |     |    | All patients                                                             |
| 2017-Maruyama-Cancer Sci       | 3<br>2 | 2 |              | JapicCTI-142755 | Hodgkin lymphoma     | Hematologic malignancy | 17      | 3 mg/kg Q2W | 17      | 17  | 4  | Drug-related; ≥ 10% All patients or immunerelated                        |
| 2017-Morris-Lancet Oncol       | 3<br>3 | 2 | 0231<br>4169 |                 | Anal cancer          | GI cancer              | 37      | 3 mg/kg Q2W | 37      |     |    | Treatment-related/ Drug-related; All AEs                                 |
| 2017-Overman-Lancet Oncol      | 3<br>4 | 2 | 0206<br>0188 | CheckMate 142   | Colorectal cancer    | GI cancer              | 74      | 3 mg/kg Q2W | 74      | 51  | 15 | Treatment-related; ≥ 10% Patients (grade 1-2) and all events (grade 3-4) |
| 2017-Sharma-Lancet Oncol       | 3<br>5 | 2 | 0238<br>7996 |                 | Urothelial carcinoma | GU cancer              | 27<br>0 | 3 mg/kg Q2W | 27<br>0 | 170 | 47 | Treatment-related; ≥ 5% All patients and select (immunomediated)         |
| 2017-Weber-N Engl J Med        | 3<br>6 | 3 | 0238<br>8906 | CheckMate 238   | Melanoma             | Melanoma               | 45<br>2 | 3 mg/kg Q2W | 45<br>2 | 385 | 65 | Treatment-related; ≥ 10% Patients in either group                        |
| 2017-Yamamoto-Invest New Drugs | 3<br>7 | 1 | 0044<br>1337 |                 | Solid tumors         | Mixed cancer types     | 14      | 1 mg/kg Q2W | 3       | 3   | 0  | Drug-related; ≥ 2 Patients                                               |
|                                |        |   |              |                 |                      |                        |         | 3 mg/kg Q2W | 5       | 5   | 1  | Drug-related; ≥ 2                                                        |

|                                |        |   |              |                     |                  |                                   |              |                                                 |         |    |    |  |                                                                                                                                                            |
|--------------------------------|--------|---|--------------|---------------------|------------------|-----------------------------------|--------------|-------------------------------------------------|---------|----|----|--|------------------------------------------------------------------------------------------------------------------------------------------------------------|
|                                |        |   |              |                     |                  |                                   |              |                                                 |         |    |    |  | Patient<br>s                                                                                                                                               |
|                                |        |   |              |                     |                  |                                   | 10 mg/kg Q2W | 6                                               | 6       | 0  |    |  | Drug-<br>related;<br>≥ 2<br>Patient<br>s                                                                                                                   |
| 2017-Yamazaki-<br>Cancer Sci   | 3<br>8 | 2 |              | JapicCTI-<br>142533 | Melanoma         | Melanom<br>a                      | 23           | 3 mg/kg Q2W                                     | 23      | 20 | 3  |  | Treatm<br>ent-<br>related<br>AEs in<br>≥10%<br>Patient<br>s;<br>Treatm<br>ent-<br>related<br>serious<br>AEs;<br>Treatm<br>ent-<br>related<br>select<br>AEs |
| 2018-Armand-J<br>Clin Oncol    | 3<br>9 | 2 | 0218<br>1738 | CheckMate<br>205    | Hodgkin lymphoma | Hematolo<br>gic<br>malignanc<br>y | 80           | 3 mg/kg Q2W                                     | 80      |    |    |  | Drug-<br>related;<br>≥ 10%<br>Patient<br>s<br>(grade<br>1-2)<br>and all<br>events<br>(grade<br>3-4)                                                        |
| 2018-D'Angelo-<br>Lancet Oncol | 4<br>0 | 2 | 0250<br>0797 | Alliance<br>A091401 | Sarcoma          | Mixed<br>cancer<br>types          | 42           | 3 mg/kg Q2W                                     | 42      |    | 3  |  | ≥ 10%<br>Patient<br>s<br>(grade<br>1-2) or<br>≥ 1<br>Patient<br>(grade<br>3-5)                                                                             |
| 2018-Forde-N Engl<br>J Med     | 4<br>1 | 2 | 0225<br>9621 |                     | NSCLC            | Lung<br>cancer                    | 22           | 3 mg/kg Q2W                                     | 22      | 5  | 1  |  | Treatm<br>ent-<br>related                                                                                                                                  |
| 2018-Gettinger-J<br>Clin Oncol | 4<br>2 | 1 | 0073<br>0639 | CA209-003           | NSLCL            | Lung<br>cancer                    | 12<br>9      | 1 (n=33), 3 (n=37)<br>or 10 (n=59)<br>mg/kg Q2W | 12<br>9 | 91 | 22 |  | Treatm<br>ent-<br>related<br>(with<br>potenti<br>al<br>immun<br>ologic<br>cause)                                                                           |

|                             |        |         |              |                   |                        |                |         |             |         |     |    |                                                                                                                                    |
|-----------------------------|--------|---------|--------------|-------------------|------------------------|----------------|---------|-------------|---------|-----|----|------------------------------------------------------------------------------------------------------------------------------------|
| 2018-Hellmann-N Engl J Med  | 4<br>3 | 3       | 0247<br>7826 | CheckMate<br>227  | NSCLC                  | Lung<br>cancer | 39<br>1 | 240 mg Q2W  | 39<br>1 | 251 | 74 | Treatm<br>ent-<br>related;<br>≥ 10%<br>Patient<br>s (any<br>grade)<br>in any<br>group                                              |
| 2018-Hodi-Lancet Oncol      | 4<br>4 | 3       | 0184<br>4505 | CheckMate<br>067  | Melanoma               | Melanoma       | 31<br>3 | 3 mg/kg Q2W | 31<br>3 | 270 | 71 | Treatm<br>ent-<br>related;<br>≥ 10%<br>Patient<br>s (any<br>grade)<br>or ≥ 2%<br>Patient<br>s<br>(grade<br>3-4) in<br>any<br>group |
| 2018-Janjigian-J Clin Oncol | 4<br>5 | 1/<br>2 | 0192<br>8394 | CheckMate<br>-032 | Esophagogastric cancer | GI cancer      | 59      | 3 mg/kg Q2W | 59      | 41  | 10 | Treatm<br>ent-<br>related;<br>≥ 15%<br>Patient<br>s (any<br>grade)<br>in any<br>group                                              |
| 2018-Lee-Lung Cancer        | 4<br>6 | 2       | 0217<br>5017 |                   | NSCLC                  | Lung<br>cancer | 10<br>0 | 3 mg/kg Q2W | 10<br>0 |     |    | Treatm<br>ent-<br>related;<br>≥ 1<br>Patient<br>(any<br>grade<br>and<br>grade ≥<br>3)                                              |
|                             |        |         |              |                   | NSCLC (Squamous)       |                |         | 3 mg/kg Q2W | 44      |     |    | Treatm<br>ent-<br>related;<br>≥ 1<br>Patient<br>(any<br>grade<br>and<br>grade ≥<br>3)                                              |
|                             |        |         |              |                   | NSCLC (Non-squamous)   |                |         | 3 mg/kg Q2W | 56      |     |    | Treatm<br>ent-<br>related;<br>≥ 1                                                                                                  |

|                                     |    |     |          |               |                                                                                                                |              |     |             |     |    |    |                                                                                       |
|-------------------------------------|----|-----|----------|---------------|----------------------------------------------------------------------------------------------------------------|--------------|-----|-------------|-----|----|----|---------------------------------------------------------------------------------------|
|                                     |    |     |          |               |                                                                                                                |              |     |             |     |    |    | Patient (any grade and grade ≥ 3)                                                     |
| 2018-Long-Lancet Oncol              | 47 | 2   | 02374242 |               | Melanoma (brain metastases; No previous local brain therapy)                                                   | Melanoma     | 41  | 3 mg/kg Q2W | 25  | 20 | 4  | Treatment-related; ≥ 10% Patients (any grade) or ≥ 1 Patient (grade 3-4) in any group |
|                                     |    |     |          |               | Melanoma (brain metastases; Failed local therapy, or who had neurological symptoms, or leptomeningeal disease) | Melanoma     | 41  | 3 mg/kg Q2W | 16  | 9  | 0  | Treatment-related; ≥ 10% Patients (any grade) or ≥ 1 Patient (grade 3-4) in any group |
| 2018-Ma-J Clin Oncol                | 48 | 2   | 02339558 | NCI-9742      | Nasopharyngeal carcinoma                                                                                       | Other cancer | 45  | 3 mg/kg Q2W | 45  |    | 10 | All treatment-related                                                                 |
| 2018-Omuro-Neuro Oncol              | 49 | 1   | 02017717 | CheckMate 143 | Glioblastoma                                                                                                   | Other cancer | 10  | 3 mg/kg Q2W | 10  | 9  | 0  | Treatment-related; ≥ 2 Patients in any arm or treatment-related serious AEs           |
| 2018-Quispel-Janssen-J Thorac Oncol | 50 | 2   | 02497508 |               | Pleural mesothelioma                                                                                           | Other cancer | 34  | 3 mg/kg Q2W | 34  | 26 | 9  | All treatment-related                                                                 |
| 2018-Ready-J Thorac Oncol           | 51 | 1/2 | 01928394 | CheckMate 32  | SCLC                                                                                                           | Lung cancer  | 109 | 3 mg/kg Q2W | 109 | 60 | 13 | Treatment-related; ≥ 5%                                                               |

|                                 |        |   |              |                 |                       |                          |         |              |         |     |    |  | Patient<br>s (any<br>grade)                                        |
|---------------------------------|--------|---|--------------|-----------------|-----------------------|--------------------------|---------|--------------|---------|-----|----|--|--------------------------------------------------------------------|
| <b>Pembrolizumab</b>            |        |   |              |                 |                       |                          |         |              |         |     |    |  |                                                                    |
| 2015-Garon-N Engl<br>J Med      | 5<br>2 | 1 | 0129<br>5827 | KEYNOTE-<br>001 | NSCLC                 | Lung<br>cancer           | 49<br>5 | 2 mg/kg Q3W  | 6       |     |    |  | Treatm<br>ent-<br>related;<br>≥ 2%<br>Patient<br>s in any<br>group |
|                                 |        |   |              |                 |                       |                          |         | 10 mg/kg Q3W | 28<br>7 |     |    |  | Treatm<br>ent-<br>related;<br>≥ 2%<br>Patient<br>s in any<br>group |
|                                 |        |   |              |                 |                       |                          |         | 10 mg/kg Q2W | 20<br>2 |     |    |  | Treatm<br>ent-<br>related;<br>≥ 2%<br>Patient<br>s in any<br>group |
| 2015-Le-N Engl J<br>Med         | 5<br>3 | 2 | 0187<br>6511 | MK-3475-<br>016 | Advanced solid tumors | Mixed<br>cancer<br>types | 41      | 10 mg/kg Q2W | 41      | 40  | 17 |  | > 5%<br>Patient<br>s                                               |
| 2015-Patnaik-Clin<br>Cancer Res | 5<br>4 | 1 | 0129<br>5827 | KEYNOTE-<br>001 | Advanced solid tumors | Mixed<br>cancer<br>types | 23      | 10 mg/kg Q2W | 10      | 4   | 0  |  | Treatm<br>ent-<br>related;<br>≥ 1<br>Patient                       |
|                                 |        |   |              |                 |                       |                          |         | 2 mg/kg Q3W  | 7       | 7   | 0  |  | Treatm<br>ent-<br>related;<br>≥ 1<br>Patient                       |
|                                 |        |   |              |                 |                       |                          |         | 10 mg/kg Q3W | 6       | 4   | 0  |  | Treatm<br>ent-<br>related;<br>≥ 1<br>Patient                       |
| 2015-Ribas-Lancet<br>Oncol      | 5<br>5 | 2 | 0170<br>4287 | KEYNOTE-<br>002 | Melanoma              | Melanom<br>a             | 35<br>7 | 2 mg/kg Q3W  | 17<br>8 | 120 | 19 |  | Treatm<br>ent-<br>related;<br>≥ 5%<br>Patient<br>s in any<br>group |
|                                 |        |   |              |                 |                       |                          |         | 10 mg/kg Q3W | 17<br>9 | 132 | 25 |  | Treatm<br>ent-<br>related;<br>≥ 5%<br>Patient                      |

|                          |    |    |          |             |                            |                        |     |              |     |     |    |  |                                                                                                          |
|--------------------------|----|----|----------|-------------|----------------------------|------------------------|-----|--------------|-----|-----|----|--|----------------------------------------------------------------------------------------------------------|
|                          |    |    |          |             |                            |                        |     |              |     |     |    |  | s in any group                                                                                           |
| 2015-Robert-N Engl J Med | 56 | 3  | 01866319 | KEYNOTE-006 | Melanoma                   | Melanoma               | 555 | 10 mg/kg Q2W | 278 | 221 | 37 |  | Treatment-related; ≥ 1% Patients in any group and AEs of special interest (autoimmune or immune-related) |
|                          |    |    |          |             |                            |                        |     | 10 mg/kg Q3W | 277 | 202 | 28 |  | Treatment-related; ≥ 1% Patients in any group and AEs of special interest (autoimmune or immune-related) |
| 2016-Armand-J Clin Oncol | 57 | 1b | 01953692 | KEYNOTE-013 | Classical Hodgkin Lymphoma | Hematologic malignancy | 31  | 10 mg/kg Q2W | 31  | 21  | 5  |  | Treatment-related; ≥ 2 Patients of any grade                                                             |
| 2016-Chow-J Clin Oncol   | 58 | 1b | 01848834 | KEYNOTE-012 | Head and neck carcinoma    | Other cancer           | 132 | 200 mg Q3W   | 132 | 82  | 12 |  | Treatment-related; ≥ 10% Patients (grade 1-2) and any event (grade 3-4)                                  |

|                            |    |     |          |             |                |             |     |              |     |     |    |                                                                                                             |
|----------------------------|----|-----|----------|-------------|----------------|-------------|-----|--------------|-----|-----|----|-------------------------------------------------------------------------------------------------------------|
| 2016-Herbst-Lancet         | 59 | 2/3 | 01905657 | KEYNOTE-010 | NSCLC          | Lung cancer | 682 | 2 mg/kg Q3W  | 339 | 215 | 43 | Treatm ent-related ≥ 1% of patients in any group; Special interest ≥ 2 patients in the pembrolizumab groups |
|                            |    |     |          |             |                |             |     | 10 mg/kg Q3W | 343 | 226 | 55 | Treatm ent-related ≥ 1% of patients in any group; Special interest ≥ 2 patients in the pembrolizumab groups |
| 2016-Goldberg-Lancet Oncol | 60 | 2   | 02085070 |             | Melanoma       | Melanoma    | 36  | 10 mg/kg Q2W | 18  |     |    | Neurological; Treatm ent-related non-neurological                                                           |
|                            |    |     |          |             | NSCLC          | Lung cancer |     | 10 mg/kg Q2W | 18  |     |    | Neurological; Treatm ent-related non-neurological                                                           |
| 2016-Muro-Lancet Oncol     | 61 | 1b  | 01848834 | KEYNOTE-012 | Gastric cancer | GI cancer   | 39  | 10 mg/kg Q2W | 39  | 26  | 5  | Treatm ent-related; ≥ 10% Patients (grade 1-2) and all events                                               |



|                               |        |    |              |                 |                         |                    |         |                                 |         |     |    |                                                                             |
|-------------------------------|--------|----|--------------|-----------------|-------------------------|--------------------|---------|---------------------------------|---------|-----|----|-----------------------------------------------------------------------------|
|                               |        |    |              |                 |                         |                    |         |                                 |         |     |    | (grade 3-5)                                                                 |
| 2016-Nanda-J Clin Oncol       | 6<br>2 | 1b | 0244<br>7003 | KEYNOTE-<br>012 | TNBC                    | Other cancer       | 32      | 10 mg/kg Q2W                    | 32      | 18  | 5  | Treatm ent-related; ≥ 2 Patient s (any grade) and ≥ 1 Patient s (grade 3-5) |
| 2016-Nghiem-N Engl J Med      | 6<br>3 | 2  | 0226<br>7603 | MK-3475         | Merkel cell Carcinoma   | Other cancer       | 26      | 2 mg/kg Q3W                     | 26      | 20  | 4  | Drug-related                                                                |
| 2016-Reck-N Engl J Med        | 6<br>4 | 3  | 0214<br>2738 | KEYNOTE-<br>024 | NSCLC                   | Lung cancer        | 15<br>4 | 200 mg Q3W                      | 15<br>4 | 113 | 41 | Treatm ent-related; ≥10% Patient s in either group                          |
| 2016-Ribas-JAMA               | 6<br>5 | 1b | 0129<br>5827 | KEYNOTE-<br>001 | Melanoma                | Melanom a          | 65<br>5 | 10 mg/kg Q2W,<br>2,10 mg/kg Q3W | 65<br>5 | 544 | 92 | Treatm ent-related/<br>Drug-related; ≥ 5% Patient s                         |
| 2016-Seiwert-Lancet Oncol     | 6<br>6 | 1b | 0184<br>8834 | KEYNOTE-<br>012 | Head and neck carcinoma | Other cancer       | 60      | 10 mg/kg Q2W                    | 60      | 38  | 10 | Treatm ent-related                                                          |
| 2016-Shimizu-Invest New Drugs | 6<br>7 | 1  | 0184<br>0579 | MK-3475         | Advanced solid tumors   | Mixed cancer types | 7       | 10 mg/kg Q2W                    | 7       |     |    | Treatm ent-related/<br>Drug-related                                         |
| 2017-Alley-Lancet Oncol       | 6<br>8 | 1b | 0205<br>4806 | KEYNOTE-<br>028 | Pleural mesothelioma    | Other cancer       | 25      | 10 mg/kg Q2W                    | 25      | 16  | 5  | Treatm ent-related                                                          |
| 2017-Balar-Lancet Oncol       | 6<br>9 | 2  | 0233<br>5424 | KEYNOTE-<br>052 | Urothelial carcinoma    | GU cancer          | 37<br>0 | 200 mg Q3W                      | 37<br>0 | 229 | 57 | Treatm ent-related; ≥ 10% Patient s (grade 1-2) and all events (grade 3-5)  |

|                             |    |    |          |                |                               |                        |     |              |     |     |    |                                                                                               |
|-----------------------------|----|----|----------|----------------|-------------------------------|------------------------|-----|--------------|-----|-----|----|-----------------------------------------------------------------------------------------------|
| 2017-Bellmunt-N Engl J Med  | 70 | 3  | 02256436 | KEYNOTE-045    | Advanced urothelial carcinoma | GU cancer              | 266 | 200 mg Q3W   | 266 | 162 | 40 | Treatment-related in ≥ 10% Patients in either group; Event of interest (immune-related cause) |
| 2017-Bauml-J Clin Oncol     | 71 | 2  | 02255097 | KEYNOTE-055    | Head and neck cancer          | Other cancer           | 171 | 200 mg Q3W   | 171 | 109 | 26 | Treatment-related; ≥ 2% Patients                                                              |
| 2017-Chen-J Clin Oncol      | 72 | 2  | 02453594 | KEYNOTE-087    | Hodgkin lymphoma              | Hematologic malignancy | 210 | 200 mg Q3W   | 210 |     |    | Treatment-related; ≥ 5% All patients                                                          |
| 2017-Ding-Blood             | 73 | 2  | 02332980 | NCI-2014-02561 | CLL                           | Hematologic malignancy | 25  | 200 mg Q3W   | 25  | 25  | 15 | Drug-related; ≥ 5% Patients                                                                   |
| 2017-Doi-J Clin Oncol       | 74 | 1b | 02054806 | KEYNOTE-028    | Esophageal carcinoma          | GI cancer              | 23  | 10 mg/kg Q2W | 23  | 9   | 4  | Treatment-related; ≥ 1 Patient                                                                |
| 2017-Frenel-J Clin Oncol    | 75 | 1b | 02054806 | KEYNOTE-028    | Cervical cancer               | Other cancer           | 24  | 10 mg/kg Q2W | 24  | 18  | 5  | Treatment-related; ≥ 2 Patients of any grade                                                  |
| 2017-Gangadhar-J Immunother | 76 |    | 02083484 | KEYNOTE-030    | Melanoma                      | Melanoma               | 947 | 2 mg/kg Q3W  | 947 | 181 | 29 | Treatment-related of interest based on possible immun                                         |

|                           |        |    |              |                 |                          |              |         |              |         |     |    |                                                                                                                                 |               |
|---------------------------|--------|----|--------------|-----------------|--------------------------|--------------|---------|--------------|---------|-----|----|---------------------------------------------------------------------------------------------------------------------------------|---------------|
|                           |        |    |              |                 |                          |              |         |              |         |     |    |                                                                                                                                 | e<br>etiology |
| 2017-Hsu-J Clin Oncol     | 7<br>7 | 1b | 0205<br>4806 | KEYNOTE-<br>028 | Nasopharyngeal carcinoma | Other cancer | 27      | 10 mg/kg Q2W | 27      | 20  | 8  | Treatm<br>ent-<br>related/<br>Drug-<br>related;<br>≥ 5%<br>Patient<br>s (any<br>grade)<br>and<br>any<br>event<br>(grade<br>3-5) |               |
| 2017-Ott-J Clin Oncol     | 7<br>8 | 1b | 0205<br>4806 | KEYNOTE-<br>028 | Endometrial cancer       | Other cancer | 24      | 10 mg/kg Q2W | 24      | 13  | 4  | Treatm<br>ent-<br>related;<br>≥ 1<br>Patient                                                                                    |               |
| 2017-Ott-Ann Oncol        | 7<br>9 | 1b | 0205<br>4806 | KEYNOTE-<br>028 | Anal canal carcinoma     | GI cancer    | 25      | 10 mg/kg Q2W | 25      | 16  | 3  | Treatm<br>ent-<br>related;<br>≥ 2<br>Patient<br>s (any<br>grade)<br>and ≥ 1<br>Patient<br>(grade<br>3-4)                        |               |
| 2017-Ott-J Clin Oncol     | 8<br>0 | 1b | 0205<br>4806 | KEYNOTE-<br>028 | SCLC                     | Lung cancer  | 24      | 10 mg/kg Q2W | 24      | 16  | 1  | Treatm<br>ent-<br>related;<br>≥ 5%<br>Patient<br>s                                                                              |               |
| 2017-O'Neil-PLoS One      | 8<br>1 | 1b | 0205<br>4806 | KEYNOTE-<br>028 | Colorectal carcinoma     | GI           | 23      | 10 mg/kg Q2W | 23      | 8   | 1  | Treatm<br>ent-<br>related                                                                                                       |               |
| 2017-Plimack-Lancet Oncol | 8<br>2 | 1b | 0184<br>8834 | KEYNOTE-<br>012 | Urothelial cancer        | GU cancer    | 33      | 10 mg/kg Q2W | 33      | 20  | 5  | Treatm<br>ent-<br>related;<br>≥ 10%<br>Patient<br>s<br>(grade<br>1-2)<br>and all<br>events<br>(grade<br>3-4)                    |               |
| 2017-Schachter-Lancet     | 8<br>3 | 3  | 0186<br>6319 | KEYNOTE-<br>006 | Melanoma                 | Melanoma     | 55<br>5 | 10 mg/kg Q2W | 27<br>8 | 229 | 47 | Treatm<br>ent-<br>related;                                                                                                      |               |

|                                          |    |    |          |             |                     |                        |              |                            |     |     |    |  | ≥ 10% Patients in any group                                                            |
|------------------------------------------|----|----|----------|-------------|---------------------|------------------------|--------------|----------------------------|-----|-----|----|--|----------------------------------------------------------------------------------------|
|                                          |    |    |          |             |                     |                        | 10 mg/kg Q3W | 277                        | 213 | 46  |    |  | Treatment-related; ≥ 10% Patients in any group                                         |
| 2017-Tawbi-Lancet Oncol                  | 84 | 2  | 02301039 | SARC028     | Bone sarcoma        | Other cancer           | 84           | 200 mg Q3W                 | 42  | 40  | 21 |  | Events with maximum grade 2 occurring in <10% of patients overall have been suppressed |
|                                          |    |    |          |             | Soft-tissue sarcoma | Other cancer           |              | 200 mg Q3W                 | 42  | 38  | 21 |  | Events with maximum grade 2 occurring in <10% of patients overall have been suppressed |
| 2017-Yamazaki-Cancer Chemother Pharmacol | 85 | 1b | 02180061 | KEYNOTE-041 | Melanoma            | Melanoma               | 42           | 2 mg/kg Q3W                | 42  | 34  | 8  |  | Treatment-related; ≥ 2 Patients                                                        |
| 2017-Zinzani-Blood                       | 86 | 1b | 01953692 | KEYNOTE-013 | PMBCL               | Hematologic malignancy | 18           | 10 mg/kg Q2W, 200mg/kg Q3W | 18  | 11  | 2  |  | Drug-related adverse events                                                            |
| 2018-Adams-Ann Oncol                     | 87 | 2  | 02447003 | KEYNOTE-086 | TNBC                | Other cancer           | 107          | 200 mg Q3W                 | 107 | 103 | 22 |  | Treatment-related ≥ 5%                                                                 |

|                               |        |    |              |                 |                          |                 |         |              |         |     |  |  |  |  |  |  |  |  |  |  |  |                                                                                                                                                                  |
|-------------------------------|--------|----|--------------|-----------------|--------------------------|-----------------|---------|--------------|---------|-----|--|--|--|--|--|--|--|--|--|--|--|------------------------------------------------------------------------------------------------------------------------------------------------------------------|
|                               |        |    |              |                 |                          |                 |         |              |         |     |  |  |  |  |  |  |  |  |  |  |  | Patient<br>s or<br>immun<br>e-<br>mediat<br>ed ≥ 1<br>Patient                                                                                                    |
| 2018-Adra-Ann<br>Oncol        | 8<br>8 | 2  | 0249<br>9952 | GU14-206        | Germ cell tumors         | GU<br>cancer    | 12      | 200 mg Q3W   | 12      |     |  |  |  |  |  |  |  |  |  |  |  | All<br>commo<br>n and ≥<br>grade 3<br>AEs<br>observ<br>ed                                                                                                        |
| 2018-Cho-J Clin<br>Oncol      | 8<br>9 | 2  | 0260<br>7631 |                 | Thymic epithelial tumor  | Other<br>cancer | 33      | 200 mg Q3W   | 33      |     |  |  |  |  |  |  |  |  |  |  |  | Treatm<br>ent-<br>related;<br>> 5%<br>Patient<br>s (any<br>grade)<br>in any<br>histolog<br>ic<br>group<br>or ≥ 1<br>Patient<br>(irAE)                            |
| 2018-Cohen-Am J<br>Clin Oncol | 9<br>0 | 1b | 0205<br>4806 | KEYNOTE-<br>028 | Salivary gland carcinoma | Other<br>cancer | 26      | 10 mg/kg Q2W | 26      | 22  |  |  |  |  |  |  |  |  |  |  |  | Treatm<br>ent-<br>related;<br>≥ 2<br>Patient<br>s (any<br>grade)<br>or ≥ 1<br>Patient<br>(grade<br>3-5)                                                          |
| 2018-Cohen-<br>Lancet         | 9<br>1 | 3  | 0225<br>2042 | KEYNOTE-<br>040 | Head and neck carcinoma  | Other<br>cancer | 24<br>6 | 200 mg Q3W   | 24<br>6 | 155 |  |  |  |  |  |  |  |  |  |  |  | Treatm<br>ent-<br>related<br>≥ 10%<br>Patient<br>s or<br>immun<br>e-<br>related<br>(regard<br>less of<br>attributi<br>on to<br>treatme<br>nt) ≥<br>1%<br>Patient |

|                             |        |    |              |               |                                               |              |         |              |         |     |    |                                                                        | s in either group |
|-----------------------------|--------|----|--------------|---------------|-----------------------------------------------|--------------|---------|--------------|---------|-----|----|------------------------------------------------------------------------|-------------------|
| 2018-Eggermont-N Engl J Med | 9<br>2 | 3  | 0236<br>2594 | EORTC<br>1325 | Melanoma                                      | Melanoma     | 50<br>9 | 200 mg Q3W   | 50<br>9 | 396 | 75 | Treatment-related or irAE; ≥ 10% Patients                              |                   |
| 2018-Fuchs-JAMA Oncol       | 9<br>3 | 2  | 0233<br>5411 | KEYNOTE-059   | Gastric or gastro-oesophageal junction cancer | GI cancer    | 25<br>9 | 200 mg Q3W   | 25<br>9 | 156 | 46 | Treatment-related; ≥ 5% Patients (any grade)                           |                   |
| 2018-Gadgeel-J Thorac Oncol | 9<br>4 | 2  |              |               | SCLC                                          | Lung cancer  | 45      | 200 mg Q3W   | 45      |     |    | Treatment-related; ≥ 10% Patients (any grade)                          |                   |
| 2018-Giaccone-Lancet Oncol  | 9<br>5 | 2  | 0236<br>4076 |               | Thymic carcinoma                              | Other cancer | 40      | 200 mg Q3W   | 40      |     |    | All treatment-related                                                  |                   |
| 2018-Hansen-Ann Oncol       | 9<br>6 | 1b | 0205<br>4806 | KEYNOTE-028   | Prostate adenocarcinoma                       | GU cancer    | 23      | 10 mg/kg Q2W | 23      | 14  | 3  | Treatment-related; ≥ 2 Patients (any grade) or ≥ 1 Patient (grade 3-4) |                   |
| 2018-Necchi-J Clin Oncol    | 9<br>7 | 2  | 0273<br>6266 | PURE-01       | Urothelial bladder carcinoma                  | GU cancer    | 50      | 200 mg Q3W   | 50      |     |    | All treatment-related                                                  |                   |
| 2018-Rugo-Clin Cancer Res   | 9<br>8 | 1b | 0205<br>4806 | KEYNOTE-028   | Breast cancer                                 | Other cancer | 25      | 10 mg/kg Q2W | 25      | 16  | 4  | Treatment-related; ≥ 2 Patients (any grade) or ≥ 1 Patient (grade 3-4) |                   |
| 2018-Shitara-Lancet         | 9<br>9 | 3  | 0237<br>0498 | KEYNOTE-061   | Gastric or gastro-oesophageal junction cancer | GI cancer    | 29<br>4 | 200 mg Q3W   | 29<br>4 | 155 | 42 | Treatment-                                                             |                   |

|                                  |             |    |              |                    |                            |                          |         |                                                    |         |     |    |                                                                                                                                                                                                                                                         |
|----------------------------------|-------------|----|--------------|--------------------|----------------------------|--------------------------|---------|----------------------------------------------------|---------|-----|----|---------------------------------------------------------------------------------------------------------------------------------------------------------------------------------------------------------------------------------------------------------|
|                                  |             |    |              |                    |                            |                          |         |                                                    |         |     |    | related<br>≥ 10%<br>Patient<br>s (any<br>grade)<br>in<br>either<br>group<br>or AEs<br>of<br>special<br>interest<br>(based<br>on their<br>likely<br>immun<br>e<br>aetiolog<br>y,<br>irrespe<br>ctive of<br>attributi<br>on to<br>study<br>treatme<br>nt) |
| 2018-Zhu-Lancet<br>Oncol         | 1<br>0<br>0 | 2  | 0270<br>2414 | KEYNOTE-<br>224    | Hepatocellular carcinoma   | GI cancer                | 10<br>4 | 200 mg Q3W                                         | 10<br>4 | 76  | 27 | Treatm<br>ent-<br>related;<br>≥ 10%<br>Patient<br>s<br>(grade<br>1-2) or<br>≥ 1<br>Patient<br>(grade<br>3-5)                                                                                                                                            |
| <b>Atezolizumab</b>              |             |    |              |                    |                            |                          |         |                                                    |         |     |    |                                                                                                                                                                                                                                                         |
| 2014-Herbst-<br>Nature           | 1<br>0<br>1 | 1a | 0137<br>5842 | 2011-<br>001422-23 | Advanced incurable cancers | Mixed<br>cancer<br>types | 27<br>7 | 0.01, 0.03, 0.1,<br>0.3, 1, 3, 10, 20<br>mg/kg Q3W | 27<br>7 | 194 | 35 | Treatm<br>ent-<br>related;<br>≥ 4%<br>Patient<br>s (any<br>grade)<br>and ≥ 2<br>Patient<br>s<br>(grade<br>3-4)                                                                                                                                          |
| 2016-<br>Fehrenbacher-<br>Lancet | 1<br>0<br>2 | 2  | 0190<br>3993 | POPLAR             | NSCLC                      | Lung<br>cancer           | 14<br>2 | 1200 mg Q3W                                        | 14<br>2 | 95  | 16 | Treatm<br>ent-<br>related;<br>≥ 10%                                                                                                                                                                                                                     |

|                                    |             |    |              |                    |                       |                          |         |                                  |         |     |    |                                                                                                                               |                                                      |
|------------------------------------|-------------|----|--------------|--------------------|-----------------------|--------------------------|---------|----------------------------------|---------|-----|----|-------------------------------------------------------------------------------------------------------------------------------|------------------------------------------------------|
|                                    |             |    |              |                    |                       |                          |         |                                  |         |     |    |                                                                                                                               | Patient<br>s in<br>either<br>group<br>(any<br>grade) |
| 2016-McDermott-J<br>Clin Oncol     | 1<br>0<br>3 | 1a | 0137<br>5842 | 2011-<br>001422-23 | RCC                   | GU<br>cancer             | 70      | 3, 10, 15, 20,<br>1200 mg/kg Q3W | 70      | 59  | 12 | Treatm<br>ent-<br>related;<br>≥ 2<br>Patient<br>s (all<br>grades)<br>and ≥ 1<br>Patient<br>(grade<br>3-4)                     |                                                      |
| 2016-Rosenberg-<br>Lancet          | 1<br>0<br>4 | 2  | 0210<br>8652 | IMvigor<br>210     | Urothelial carcinoma  | GU<br>cancer             | 31<br>0 | 1200 mg Q3W                      | 31<br>0 | 215 | 50 | Treatm<br>ent-<br>related                                                                                                     |                                                      |
| 2017-Balar-Lancet                  | 1<br>0<br>5 | 2  | 0210<br>8652 | IMvigor<br>210     | Urothelial carcinoma  | GU<br>cancer             | 11<br>9 | 1200 mg Q3W                      | 11<br>9 | 79  | 19 | Treatm<br>ent-<br>related;<br>≥ 3<br>Patient<br>s (any<br>grade)<br>and ≥ 1<br>Patient<br>(grade<br>3-4)                      |                                                      |
| 2016-Mizugaki-<br>Invest New Drugs | 1<br>0<br>6 | 1  |              |                    | Advanced solid tumors | Mixed<br>cancer<br>types | 6       | 10, 20 mg/kg<br>Q3W              | 6       | 6   | 0  | ≥ 2<br>Patient<br>s                                                                                                           |                                                      |
|                                    |             |    |              |                    |                       |                          |         | 10 mg/kg Q3W                     | 3       |     | 0  | ≥ 2<br>Patient<br>s                                                                                                           |                                                      |
|                                    |             |    |              |                    |                       |                          |         | 20 mg/kg Q3W                     | 3       |     | 0  | ≥ 2<br>Patient<br>s                                                                                                           |                                                      |
| 2017-Peters-J Clin<br>Oncol        | 1<br>0<br>7 | 2  | 0203<br>1458 | BIRCH              | NSCLC                 | Lung<br>cancer           | 65<br>9 | 1200 mg Q3W                      | 65<br>9 | 429 | 81 | Treatm<br>ent-<br>related<br>≥ 5%<br>Patient<br>s;<br>Combin<br>ed with<br>special<br>interest<br>AEs ><br>1%<br>Patient<br>s |                                                      |



|                            |             |    |              |                 |                         |                 |         |                                         |         |     |    |                                                                                                                                                                  |
|----------------------------|-------------|----|--------------|-----------------|-------------------------|-----------------|---------|-----------------------------------------|---------|-----|----|------------------------------------------------------------------------------------------------------------------------------------------------------------------|
| 2017-Rittmeyer-Lancet      | 1<br>0<br>8 | 3  | 0200<br>8227 |                 | NSCLC                   | Lung<br>cancer  | 60<br>9 | 1200 mg Q3W                             | 60<br>9 | 390 | 90 | Treatm<br>ent-<br>related;<br>≥ 10%<br>Patient<br>s in any<br>group<br>(any<br>grade)                                                                            |
| 2018-Colevas-Ann<br>Oncol  | 1<br>0<br>9 | 1  | 0137<br>5842 |                 | Head and neck carcinoma | Other<br>cancer | 32      | 15 or 20 mg/kg or<br>2000 mg Q3W        | 32      | 21  | 4  | Treatm<br>ent-<br>related;<br>≥ 5%<br>Patient<br>s (any<br>grade)<br>or ≥ 1<br>Patient<br>(grade<br>3-4)                                                         |
| 2018-Emens-JAMA<br>Oncol   | 1<br>1<br>0 | 1  | 0137<br>5842 |                 | Breast cancer           | Other<br>cancer | 11<br>6 | 15 or 20 mg/kg or<br>2000 mg Q3W        | 11<br>6 | 73  | 13 | Treatm<br>ent-<br>related;<br>≥ 3%<br>Patient<br>s (any<br>grade)                                                                                                |
| 2018-Horn-Eur J<br>Cancer  | 1<br>1<br>1 | 1  | 0137<br>5842 | PCD4989g        | NSLCL                   | Lung<br>cancer  | 89      | 10, 15 or 20<br>mg/kg or 2000 mg<br>Q3W | 89      | 68  | 10 | Treatm<br>ent-<br>related;<br>> 5%<br>Patient<br>s (any<br>grade)                                                                                                |
| 2018-Lukas-J<br>Neurooncol | 1<br>1<br>2 | 1a | 0137<br>5842 | PCD4989g        | Glioblastoma            | Other<br>cancer | 16      | 2000 mg Q3W                             | 16      | 10  | 3  | Treatm<br>ent-<br>related                                                                                                                                        |
| 2018-McDermott-<br>Nat Med | 1<br>1<br>3 | 2  | 0198<br>4242 | IMmotion1<br>50 | RCC                     | GU<br>cancer    | 10<br>3 | 1200 mg Q3W                             | 10<br>3 | 86  | 17 | All-<br>cause<br>AEs ≥<br>20%<br>Patient<br>s (any<br>grade)<br>in any<br>group<br>or AEs<br>of<br>special<br>interest<br>(based<br>on their<br>likely<br>immune |

|                               |             |    |              |                    |                       |                 |         |              |         |     |    |                                                                                                                                      |
|-------------------------------|-------------|----|--------------|--------------------|-----------------------|-----------------|---------|--------------|---------|-----|----|--------------------------------------------------------------------------------------------------------------------------------------|
|                               |             |    |              |                    |                       |                 |         |              |         |     |    | aetiolog<br>y.                                                                                                                       |
| 2018-Petrylak-<br>JAMA Oncol  | 1<br>1<br>4 | 1  | 0137<br>5842 | 2011-<br>001422-23 | Urothelial carcinoma  | GU<br>cancer    | 95      | 15 mg/kg Q3W | 95      | 64  | 9  | Treatm<br>ent-<br>related;<br>≥ 1<br>Patient<br>s                                                                                    |
| 2018-Powles-<br>Lancet        | 1<br>1<br>5 | 3  | 0230<br>2807 | IMvigor211         | Urothelial carcinoma  | GU<br>cancer    | 45<br>9 | 1200 mg Q3W  | 45<br>9 | 319 | 91 | Treatm<br>ent-<br>related;<br>≥ 5%<br>Patient<br>s (any<br>grade)<br>or ≥ 2%<br>Patient<br>s<br>(grade<br>3-4) in<br>either<br>group |
| <b>Avelumab</b>               |             |    |              |                    |                       |                 |         |              |         |     |    |                                                                                                                                      |
| 2016-Kaufman-<br>Lancet Oncol | 1<br>1<br>6 | 2  | 0215<br>5647 |                    | Merkel cell carcinoma | Other<br>cancer | 88      | 10 mg/kg Q2W | 88      | 62  | 5  | Treatm<br>ent-<br>related;<br>≥ 5%<br>Patient<br>s (any<br>grade)<br>and ≥ 1<br>Patient<br>(grade<br>3-5)                            |
| 2017-Apolo-J Clin<br>Oncol    | 1<br>1<br>7 | 1b | 0177<br>2004 |                    | Urothelial carcinoma  | GU<br>cancer    | 44      | 10 mg/kg Q2W | 44      | 29  | 3  | Treatm<br>ent-<br>related;<br>> 5%<br>Patient<br>s (any<br>grade)<br>and ≥ 1<br>Patient<br>(grade<br>≥ 3)                            |
| 2017-Gulley-Lancet<br>Oncol   | 1<br>1<br>8 | 1b | 0177<br>2004 |                    | NSCLC                 | Lung<br>cancer  | 18<br>4 | 10 mg/kg Q2W | 18<br>4 | 142 | 22 | Treatm<br>ent-<br>related;<br>≥ 5%<br>Patient<br>s (any<br>grade)<br>and ≥ 1<br>Patient                                              |

|                                    |             |    |              |                           |                                               |                    |         |              |         |     |    |                                                                              |
|------------------------------------|-------------|----|--------------|---------------------------|-----------------------------------------------|--------------------|---------|--------------|---------|-----|----|------------------------------------------------------------------------------|
|                                    |             |    |              |                           |                                               |                    |         |              |         |     |    | (grade ≥ 3)                                                                  |
| 2017-Heery-Lancet Oncol            | 1<br>1<br>9 | 1a | 0177<br>2004 |                           | Advanced solid tumors                         | Mixed cancer types | 15      | 10 mg/kg Q2W | 15      | 14  | 5  | Treatm ent-related; ≥ 10% Patient s (any grade) and ≥ 1 Patient (grade ≥ 3)  |
| 2018-Bang-Ann Oncol                | 1<br>2<br>0 | 3  | 0262<br>5623 | JAVELIN Gastric 300       | Gastric or gastro-oesophageal junction cancer | GI cancer          | 18<br>4 | 10 mg/kg Q2W | 18<br>4 | 90  | 17 | Treatm ent-related; > 10% Patient s (any grade) or > 1% Patient s (grade 3)  |
| 2018-Barlesi-Lancet Oncol          | 1<br>2<br>1 | 3  | 0239<br>5172 | JAVELIN Lung 200          | NSLCL                                         | Lung cancer        | 39<br>3 | 10 mg/kg Q2W | 39<br>3 | 251 | 39 | Treatm ent-related; ≥ 10% Patient s (grade 1-2) and ≥ 1% Patient (grade 3-5) |
| 2018-DAngelo-JAMA Oncol            | 1<br>2<br>2 | 2  | 0215<br>5647 | JAVELIN Merkel 200 part B | Merkel cell carcinoma                         | Other cancer       | 39      | 10 mg/kg Q2W | 39      | 28  | 8  | Treatm ent-related; ≥ 5% Patient s (any grade) or ≥ 1 Patient (grade 3-4)    |
| 2018-Dirix-Breast Cancer Res Treat | 1<br>2<br>3 | 1b | 0177<br>2004 | JAVELIN                   | Breast cancer                                 | Other cancer       | 16<br>8 | 10 mg/kg Q2W | 16<br>8 | 115 | 21 | Treatm ent-related; ≥ 5% Patient s (any grade)                               |

|                                      |             |         |              |                             |                           |                          |         |              |         |     |    |                                                                                                                                                        |
|--------------------------------------|-------------|---------|--------------|-----------------------------|---------------------------|--------------------------|---------|--------------|---------|-----|----|--------------------------------------------------------------------------------------------------------------------------------------------------------|
|                                      |             |         |              |                             |                           |                          |         |              |         |     |    | or ≥ 1 Patient (grade ≥ 3)                                                                                                                             |
| 2018-Le Tourneau-J Immunother Cancer | 1<br>2<br>4 | 1b      | 0177<br>2004 | JAVELIN<br>Solid<br>Tumor   | Adrenocortical carcinoma  | GU<br>cancer             | 25      | 10 mg/kg Q2W | 25      | 20  | 2  | Treatm<br>ent-<br>related;<br>≥ 10%<br>Patient<br>s (any<br>grade)<br>or ≥ 1<br>Patient<br>(grade<br>3) in<br>either<br>group                          |
| <b>Durvalumab</b>                    |             |         |              |                             |                           |                          |         |              |         |     |    |                                                                                                                                                        |
| 2016-Massard-J Clin Oncol            | 1<br>2<br>5 | 1/<br>2 | 0169<br>3562 |                             | Urothelial Bladder Cancer | GU<br>cancer             | 61      | 10 mg/kg Q2W | 61      | 39  | 3  | Treatm<br>ent-<br>related;<br>≥ 5%<br>patients<br>or ≥ 1<br>Patient<br>(grade<br>≥ 3) or<br>≥ 2<br>Patient<br>s<br>(AESIs)                             |
| 2017-Antonia-N Engl J Med            | 1<br>2<br>6 | 3       | 0212<br>5461 | PACIFIC                     | NSCLC                     | Lung<br>cancer           | 47<br>5 | 10 mg/kg Q2W | 47<br>5 | 322 | 56 | Treatm<br>ent-<br>related;<br>≥ 5%<br>Patient<br>s in<br>either<br>group                                                                               |
| 2017-Powles-JAMA Oncol               | 1<br>2<br>7 | 1/<br>2 | 0169<br>3562 | CD-ON-<br>MEDI4736-<br>1108 | Solid cancer              | Mixed<br>cancer<br>types | 97<br>0 | 10 mg/kg Q2W | 97<br>0 | 565 | 92 | Treatm<br>ent-<br>related;<br>≥ 5%<br>Patient<br>s in<br>either<br>group<br>(all<br>grades)<br>and ≥ 1<br>Patient<br>in UC<br>cohort<br>(grade<br>≥ 3) |

|                             |             |   |              |          |                                                             |              |         |              |         |     |    |                                                                                          |
|-----------------------------|-------------|---|--------------|----------|-------------------------------------------------------------|--------------|---------|--------------|---------|-----|----|------------------------------------------------------------------------------------------|
| 2018-Garassino-Lancet Oncol | 1<br>2<br>8 | 2 | 0208<br>7423 | ATLANTIC | NSLCL (EGFR+/ALK+)                                          | Lung cancer  | 44<br>4 | 10 mg/kg Q2W | 11<br>1 | 53  | 6  | Treatm ent-related; ≥ 10% Patient s (grade 1-2) or ≥ 1 Patient (grade 3-4) in any corhot |
|                             |             |   |              |          | NSLCL (EGFR-/ALK-)                                          | Lung cancer  |         | 10 mg/kg Q2W | 26<br>5 | 157 | 22 | Treatm ent-related; ≥ 10% Patient s (grade 1-2) or ≥ 1 Patient (grade 3-4) in any corhot |
|                             |             |   |              |          | NSLCL (EGFR-/ALK- with ≥ 90% tumour cells expressing PD-L1) | Lung cancer  |         | 10 mg/kg Q2W | 68      | 46  | 12 | Treatm ent-related; ≥ 10% Patient s (grade 1-2) or ≥ 1 Patient (grade 3-4) in any corhot |
| 2018-Necchi-Eurology        | 1<br>2<br>9 | 2 | 0308<br>1923 | APACHE   | Germ cell tumors                                            | GU cancer    | 22      | 1500 mg Q4W  | 22      |     |    |                                                                                          |
| 2018-Siu-JAMA Oncol         | 1<br>3<br>0 | 2 | 0231<br>9044 | CONDOR   | Head and neck carcinoma                                     | Other cancer | 65      | 10 mg/kg Q2W | 65      | 41  | 8  | Treatm ent-related; > 5% Patient s (any grade) or > 2% Patient s (grade                  |



**eTable 2. Relative Ratios of Grade 3 or Higher Adverse Event Incidences to Respective All-grade Adverse Event Incidences**

| AE type                    | Incidence of all-grade AE (95% CI) | Incidence of grade 3 or higher AE (95% CI) | Risk ratio (95% CI) |
|----------------------------|------------------------------------|--------------------------------------------|---------------------|
| Hepatitis                  | 0.85 (0.64-1.10)                   | 0.43 (0.30-0.62)                           | 50.59 (32.01-80.31) |
| Lipase increased           | 1.69 (1.35-2.08)                   | 0.71 (0.51-0.98)                           | 42.01 (28.37-61.82) |
| GGT increased              | 1.12 (0.85-1.46)                   | 0.47 (0.30-0.69)                           | 41.96 (25.27-66.53) |
| Type 1 diabetes            | 0.43 (0.27-0.65)                   | 0.18 (0.10-0.30)                           | 41.86 (20.20-84.44) |
| Colitis                    | 1.24 (0.99-1.54)                   | 0.47 (0.34-0.65)                           | 37.90 (25.49-56.49) |
| Increased transaminases    | 0.38 (0.22-0.62)                   | 0.13 (0.05-0.27)                           | 34.21 (12.46-84.56) |
| Neutropenia                | 0.89 (0.69-1.12)                   | 0.28 (0.19-0.41)                           | 31.46 (19.58-49.31) |
| Hypertension               | 0.81 (0.56-1.13)                   | 0.23 (0.12-0.40)                           | 28.40 (13.69-55.70) |
| Hypophosphatemia           | 0.89 (0.62-1.23)                   | 0.25 (0.14-0.41)                           | 28.09 (14.27-51.00) |
| Pneumonia                  | 0.66 (0.43-0.98)                   | 0.18 (0.09-0.32)                           | 27.27 (12.56-55.87) |
| Hypoxia                    | 0.55 (0.30-0.89)                   | 0.15 (0.06-0.30)                           | 27.27 (9.50-66.34)  |
| Hypopituitarism            | 0.26 (0.12-0.50)                   | 0.07 (0.02-0.16)                           | 26.92 (6.72-85.86)  |
| Hypophysitis               | 0.60 (0.42-0.82)                   | 0.16 (0.09-0.27)                           | 26.67 (13.66-50.00) |
| Lymphopenia                | 1.52 (1.18-1.92)                   | 0.40 (0.26-0.60)                           | 26.32 (16.18-42.17) |
| Adrenal insufficiency      | 0.69 (0.50-0.93)                   | 0.18 (0.10-0.30)                           | 26.09 (13.75-47.87) |
| Dehydration                | 0.61 (0.40-0.90)                   | 0.15 (0.07-0.27)                           | 24.59 (11.11-51.22) |
| Pneumonitis                | 2.79 (2.39-3.23)                   | 0.67 (0.50-0.89)                           | 24.01 (17.41-33.22) |
| Hyponatremia               | 1.73 (1.37-2.16)                   | 0.39 (0.25-0.59)                           | 22.54 (13.91-36.02) |
| ALT increased              | 3.14 (2.71-3.62)                   | 0.70 (0.52-0.93)                           | 22.29 (15.94-30.57) |
| AST increased              | 3.39 (2.94-3.89)                   | 0.75 (0.56-0.99)                           | 22.12 (15.95-30.25) |
| Amylase increased          | 1.39 (1.06-1.78)                   | 0.30 (0.17-0.47)                           | 21.58 (11.83-36.73) |
| Anemia                     | 3.84 (3.35-4.38)                   | 0.78 (0.59-1.02)                           | 20.31 (14.88-27.25) |
| Hyperglycemia              | 1.20 (0.91-1.55)                   | 0.24 (0.13-0.38)                           | 20.00 (10.58-34.26) |
| Platelet count decreased   | 1.16 (0.85-1.52)                   | 0.20 (0.11-0.35)                           | 17.24 (8.78-32.99)  |
| Pancreatitis               | 0.42 (0.25-0.67)                   | 0.07 (0.02-0.15)                           | 16.67 (5.1-41.87)   |
| ALP increased              | 1.86 (1.50-2.28)                   | 0.27 (0.16-0.43)                           | 14.52 (8.47-24.06)  |
| Bilirubin increase         | 1.05 (0.75-1.41)                   | 0.15 (0.07-0.28)                           | 14.29 (6.16-28.88)  |
| Hypotension                | 0.79 (0.53-1.11)                   | 0.11 (0.05-0.23)                           | 13.92 (5.42-32.04)  |
| Dyspnea                    | 3.88 (3.38-4.45)                   | 0.42 (0.30-0.59)                           | 10.82 (7.61-15.5)   |
| Blood creatinine increased | 1.70 (1.35-2.12)                   | 0.18 (0.09-0.30)                           | 10.59 (5.37-18.56)  |
| Autoimmune thyroiditis     | 0.20 (0.07-0.45)                   | 0.02 (0.00-0.09)                           | 10.00 (1.36-63.79)  |
| Rash maculo-papular        | 2.78 (2.38-3.23)                   | 0.25 (0.16-0.37)                           | 8.99 (5.48-13.71)   |
| White blood cell decreased | 0.83 (0.59-1.14)                   | 0.07 (0.03-0.15)                           | 8.43 (3.19-19.78)   |
| Back pain                  | 2.12 (1.76-2.54)                   | 0.16 (0.09-0.27)                           | 7.55 (3.97-12.99)   |
| Pain in extremity          | 1.21 (0.87-1.62)                   | 0.09 (0.04-0.20)                           | 7.44 (2.90-17.82)   |
| Infusion-related reaction  | 3.63 (3.15-4.17)                   | 0.26 (0.16-0.40)                           | 7.16 (4.33-11.34)   |
| Stomatitis                 | 1.27 (1.02-1.58)                   | 0.09 (0.04-0.17)                           | 7.09 (3.13-13.72)   |
| Uveitis                    | 0.29 (0.15-0.51)                   | 0.02 (0.00-0.07)                           | 6.90 (0.90-29.38)   |
| Abdominal pain             | 2.19 (1.82-2.62)                   | 0.15 (0.08-0.26)                           | 6.85 (3.47-12.18)   |
| Diarrhea                   | 9.47 (8.43-10.58)                  | 0.59 (0.45-0.77)                           | 6.23 (4.62-8.29)    |
| Asthenia                   | 5.58 (4.92-6.31)                   | 0.34 (0.25-0.48)                           | 6.09 (4.30-8.73)    |

|                        |                     |                  |                   |
|------------------------|---------------------|------------------|-------------------|
| TSH increased          | 1.01 (0.72-1.37)    | 0.06 (0.02-0.14) | 5.94 (1.66-14.40) |
| TSH decreased          | 0.37 (0.18-0.64)    | 0.02 (0.00-0.08) | 5.41 (0.76-25.40) |
| Vomiting               | 3.53 (3.06-4.05)    | 0.19 (0.12-0.29) | 5.38 (3.35-8.46)  |
| Thyroiditis            | 0.75 (0.52-1.04)    | 0.04 (0.01-0.10) | 5.33 (1.32-14.61) |
| Fatigue                | 18.26 (16.49-20.11) | 0.89 (0.69-1.14) | 4.87 (3.70-6.34)  |
| Mucosal inflammation   | 1.10 (0.83-1.44)    | 0.05 (0.02-0.12) | 4.55 (1.36-11.12) |
| Pain                   | 2.03 (1.63-2.48)    | 0.09 (0.03-0.19) | 4.43 (1.57-9.43)  |
| Myalgia                | 2.95 (2.53-3.44)    | 0.12 (0.06-0.20) | 4.07 (2.15-6.90)  |
| Hypersensitivity       | 0.81 (0.55-1.15)    | 0.03 (0.01-0.10) | 3.70 (0.77-12.58) |
| Peripheral neuropathy  | 0.94 (0.73-1.20)    | 0.03 (0.01-0.08) | 3.19 (1.14-9.03)  |
| Rash                   | 9.31 (8.29-10.41)   | 0.27 (0.19-0.38) | 2.90 (2.02-4.14)  |
| Headache               | 3.37 (2.90-3.90)    | 0.09 (0.04-0.17) | 2.67 (1.17-5.02)  |
| Influenza-like illness | 1.89 (1.49-2.35)    | 0.05 (0.01-0.12) | 2.65 (0.62-6.67)  |
| Decreased appetite     | 7.18 (6.36-8.06)    | 0.19 (0.13-0.27) | 2.65 (1.72-3.85)  |
| Arthralgia             | 5.83 (5.15-6.59)    | 0.15 (0.10-0.23) | 2.57 (1.64-4.02)  |
| Malaise                | 1.42 (1.06-1.84)    | 0.03 (0.01-0.10) | 2.11 (0.49-7.67)  |
| Nausea                 | 8.39 (7.46-9.39)    | 0.17 (0.12-0.24) | 2.03 (1.35-2.96)  |
| Insomnia               | 1.02 (0.71-1.41)    | 0.02 (0.00-0.07) | 1.96 (0.27-7.20)  |
| Dizziness              | 1.58 (1.22-2.00)    | 0.03 (0.01-0.08) | 1.9 (0.37-5.46)   |
| Alopecia               | 0.53 (0.38-0.73)    | 0.01 (0.00-0.05) | 1.89 (0.38-9.03)  |
| Pyrexia                | 4.77 (4.18-5.42)    | 0.08 (0.04-0.14) | 1.68 (0.93-3.01)  |
| Constipation           | 3.60 (3.12-4.13)    | 0.06 (0.03-0.12) | 1.67 (0.74-3.31)  |
| Erythema               | 1.30 (0.96-1.71)    | 0.02 (0.00-0.08) | 1.54 (0.23-6.08)  |
| Hyperthyroidism        | 2.82 (2.40-3.29)    | 0.04 (0.02-0.10) | 1.42 (0.57-3.64)  |
| Weight decreased       | 2.14 (1.74-2.60)    | 0.03 (0.01-0.09) | 1.40 (0.29-4.25)  |
| Dry mouth              | 2.16 (1.74-2.63)    | 0.03 (0.01-0.09) | 1.39 (0.28-4.22)  |
| Hypothyroidism         | 6.07 (5.35-6.85)    | 0.08 (0.04-0.13) | 1.32 (0.71-2.22)  |
| Cough                  | 4.17 (3.64-4.77)    | 0.05 (0.02-0.10) | 1.20 (0.42-2.34)  |
| Edema peripheral       | 1.72 (1.40-2.11)    | 0.02 (0.01-0.07) | 1.16 (0.29-4.13)  |
| Chills                 | 2.36 (1.96-2.83)    | 0.02 (0.01-0.07) | 0.85 (0.23-3.20)  |
| Dysgeusia              | 1.28 (1.01-1.59)    | 0.01 (0.00-0.05) | 0.78 (0.17-3.90)  |
| Dry skin               | 2.59 (2.17-3.08)    | 0.02 (0.00-0.06) | 0.77 (0.10-2.25)  |
| Vitiligo               | 3.26 (2.80-3.79)    | 0.02 (0.00-0.06) | 0.61 (0.15-1.99)  |
| Pruritus               | 10.61 (9.46-11.83)  | 0.06 (0.03-0.11) | 0.57 (0.33-1.04)  |

AE: adverse event; CI: confidence interval; ALT: alanine transaminase; AST: aspartate aminotransferase; ALP: alkaline phosphatase; GGT: Gamma-glutamyltransferase; TSH: Thyroid-stimulating hormone.



**eTable 3. List of Studies That Reported At Least One Treatment-related Death**

| Study                               | Ref | Total Patient number | Cancer type                                   | Cancer type category   | Patient number | Dosing schedule                           | Number of treatment-related death | Causes of death                                                                                                  |
|-------------------------------------|-----|----------------------|-----------------------------------------------|------------------------|----------------|-------------------------------------------|-----------------------------------|------------------------------------------------------------------------------------------------------------------|
| <b>Nivolumab</b>                    |     |                      |                                               |                        |                |                                           |                                   |                                                                                                                  |
| 2015-Gettinger-J Clin Oncol         | 12  | 129                  | NSCLC                                         | Lung cancer            | 33             | 1 mg/kg Q2W                               | 2                                 | Pneumonitis                                                                                                      |
|                                     |     |                      |                                               |                        | 37             | 3 mg/kg Q2W                               | 1                                 | Pneumonitis                                                                                                      |
|                                     |     |                      |                                               |                        | 59             | 10 mg/kg Q2W                              | 0                                 |                                                                                                                  |
| 2015-Rizvi-Lancet Oncol             | 17  | 117                  | NSCLC                                         | Lung cancer            | 117            | 3 mg/kg Q2W                               | 2                                 | Hypoxic pneumonia (n=1), ischemic stroke (n=1)                                                                   |
| 2016-Ferris-N Engl J Med            | 21  | 236                  | Head and neck carcinoma                       | Other cancer           | 236            | 3 mg/kg Q2W                               | 2                                 | Pneumonitis(n=1), hypercalcemia/pulmonary embolism (n=1)                                                         |
| 2016-Lesokhin-J Clin Oncol          | 23  | 81                   | Hematologic malignancy                        | Hematologic malignancy | 81             | 1, 3 mg/kg Q2W                            | 1                                 | Pneumonitis/ARDS                                                                                                 |
| 2016-Sharma-Lancet Oncol            | 24  | 78                   | Urothelial carcinoma                          | GU cancer              | 78             | 3 mg/kg Q2W                               | 2                                 | Pneumonitis (n=1), thrombocytopenia (n=1)                                                                        |
| 2017-Carbone-N Engl J Med           | 27  | 267                  | NSCLC                                         | Lung cancer            | 267            | 3 mg/kg Q2W                               | 2                                 | Multiorgan failure (n=1), pneumonitis (n=1)                                                                      |
| 2017-Kang-Lancet                    | 29  | 330                  | Gastric or gastro-oesophageal junction cancer | GI cancer              | 330            | 3 mg/kg Q2W                               | 5                                 | Hepatitis (n=1), cardiac arrest (n=1), death (unknown cause; n=1), exertional dyspnea (n=1), and pneumonia (n=1) |
| 2017-Sharma-Lancet Oncol            | 35  | 270                  | Urothelial carcinoma                          | GU cancer              | 270            | 3 mg/kg Q2W                               | 3                                 | Pneumonitis (n=1), acute respiratory failure (n=1), cardiovascular failure (n=1)                                 |
| 2018-Gettinger-J Clin Oncol         | 42  | 129                  | NSLCL                                         | Lung cancer            | 129            | 1 (n=33), 3 (n=37) or 10 (n=59) mg/kg Q2W | 1                                 | Sepsis                                                                                                           |
| 2018-Hellmann-N Engl J Med          | 43  | 391                  | NSCLC                                         | Lung cancer            | 391            | 240 mg Q2W                                | 2                                 | Pneumonitis with sepsis (n=1), neutropenia with sepsis (n=1)                                                     |
| 2018-Hodi-Lancet Oncol              | 44  | 313                  | Melanoma                                      | Melanoma               | 313            | 3 mg/kg Q2W                               | 1                                 | Neutropenia                                                                                                      |
| 2018-Lee-Lung Cancer                | 46  | 100                  | NSCLC                                         | Lung cancer            | 100            | 3 mg/kg Q2W                               | 1                                 | Pneumonitis                                                                                                      |
| 2018-Ma-J Clin Oncol                | 48  | 45                   | Nasopharyngeal carcinoma                      | Other cancer           | 45             | 3 mg/kg Q2W                               | 1                                 | Sepsis                                                                                                           |
| 2018-Quispel-Janssen-J Thorac Oncol | 50  | 34                   | Pleural mesothelioma                          | Other cancer           | 34             | 3 mg/kg Q2W                               | 1                                 | Pneumonitis                                                                                                      |
| 2018-Ready-J Thorac Oncol           | 51  | 109                  | SCLC                                          | Lung cancer            | 109            | 3 mg/kg Q2W                               | 1                                 | Pneumonitis                                                                                                      |
| <b>Pembrolizumab</b>                |     |                      |                                               |                        |                |                                           |                                   |                                                                                                                  |

|                                          |             |             |                                               |              |     |              |   |                                                                                                                   |
|------------------------------------------|-------------|-------------|-----------------------------------------------|--------------|-----|--------------|---|-------------------------------------------------------------------------------------------------------------------|
| 2015-Garon-N Engl J Med                  | 5<br>2      | 4<br>9<br>5 | NSCLC                                         | Lung cancer  | 6   | 2 mg/kg Q3W  | 0 |                                                                                                                   |
|                                          |             |             |                                               |              | 287 | 10 mg/kg Q3W | 1 | Pneumonitis/Interstitial lung disease                                                                             |
|                                          |             |             |                                               |              | 202 | 10 mg/kg Q2W | 0 |                                                                                                                   |
| 2016-Herbst-Lancet                       | 5<br>9      | 6<br>8<br>2 | NSCLC                                         | Lung cancer  | 339 | 2 mg/kg Q3W  | 3 | Pneumonitis (n=2), pneumonia (n=1)                                                                                |
|                                          |             |             |                                               |              | 343 | 10 mg/kg Q3W | 3 | Pneumonitis (n=1), pneumonia (n=1), myocardial infarction (n=1)                                                   |
| 2016-Nanda-J Clin Oncol                  | 6<br>2      | 3<br>2      | TNBC                                          | Other cancer | 32  | 10 mg/kg Q2W | 1 | DIC accompanied by grade 4 decreased blood fibrinogen                                                             |
| 2016-Reck-N Engl J Med                   | 6<br>4      | 1<br>5<br>4 | NSCLC                                         | Lung cancer  | 154 | 200 mg Q3W   | 1 | Sudden death of unknown cause                                                                                     |
| 2017-Balar-Lancet Oncol                  | 6<br>9      | 3<br>7<br>0 | Urothelial carcinoma                          | GU cancer    | 370 | 200 mg Q3W   | 1 | Myositis                                                                                                          |
| 2017-Bellmunt-N Engl J Med               | 7<br>0      | 2<br>6<br>6 | Advanced urothelial carcinoma                 | GU cancer    | 266 | 200 mg Q3W   | 4 | Pneumonitis (n=1), urinary tract obstruction (n=1), malignant neoplasm progression (n=1), unspecified cause (n=1) |
| 2017-Bauml-J Clin Oncol                  | 7<br>1      | 1<br>7<br>1 | Head and neck cancer                          | Other cancer | 171 | 200 mg Q3W   | 1 | Pneumonitis                                                                                                       |
| 2017-Hsu-J Clin Oncol                    | 7<br>7      | 2<br>7      | Nasopharyngeal carcinoma                      | Other cancer | 27  | 10 mg/kg Q2W | 1 | Sepsis                                                                                                            |
| 2017-Schachter-Lancet                    | 8<br>3      | 5<br>5<br>5 | Melanoma                                      | Melanoma     | 278 | 10 mg/kg Q2W | 1 | Sepsis                                                                                                            |
|                                          |             |             |                                               |              | 277 | 10 mg/kg Q3W | 0 |                                                                                                                   |
| 2017-Tawbi-Lancet Oncol                  | 8<br>4      | 8<br>4      | Bone sarcoma                                  | Other cancer | 42  | 200 mg Q3W   | 2 | Neoplasms (n=1), respiratory, thoracic and mediastinal disorders (n=1)                                            |
|                                          |             |             | Soft-tissue sarcoma                           | Other cancer | 42  | 200 mg Q3W   | 4 | Sepsis (n=1), neoplasms (n=1), respiratory failure (n=1), cause not specified (n=1)                               |
| 2017-Yamazaki-Cancer Chemother Pharmacol | 8<br>5      | 4<br>2      | Melanoma                                      | Melanoma     | 42  | 2 mg/kg Q3W  | 2 | Unknown cause (n=1), cerebral hemorrhage (n=1)                                                                    |
| 2018-Cohen-Am J Clin Oncol               | 9<br>0      | 2<br>6      | Salivary gland carcinoma                      | Other cancer | 26  | 10 mg/kg Q2W | 1 | Interstitial lung disease                                                                                         |
| 2018-Cohen-Lancet                        | 9<br>1      | 2<br>4<br>6 | Head and neck carcinoma                       | Other cancer | 246 | 200 mg Q3W   | 1 | Severe skin reaction                                                                                              |
| 2018-Eggermont-N Engl J Med              | 9<br>2      | 5<br>0<br>9 | Melanoma                                      | Melanoma     | 509 | 200 mg Q3W   | 1 | Myositis                                                                                                          |
| 2018-Gadgeel-J Thorac Oncol              | 9<br>4      | 4<br>5      | SCLC                                          | Lung cancer  | 45  | 200 mg Q3W   | 1 | Acute coronary syndrome                                                                                           |
| 2018-Shitara-Lancet                      | 9<br>9      | 2<br>9<br>4 | Gastric or gastro-oesophageal junction cancer | GI cancer    | 294 | 200 mg Q3W   | 2 | Colitis (n=1), interstitial lung disease (n=1)                                                                    |
| 2018-Zhu-Lancet Oncol                    | 1<br>0<br>0 | 1<br>0<br>4 | Hepatocellular carcinoma                      | GI cancer    | 104 | 200 mg Q3W   | 1 | Ulcerative oesophagitis                                                                                           |
| <b>Atezolizumab</b>                      |             |             |                                               |              |     |              |   |                                                                                                                   |
| 2016-Fehrenbacher-Lancet                 | 1<br>0<br>2 | 1<br>4<br>2 | NSCLC                                         | Lung cancer  | 142 | 1200 mg Q3W  | 1 | Cardiac failure                                                                                                   |

|                                    |             |             |                      |                    |     |                               |   |                                                                                                                                                                                                         |
|------------------------------------|-------------|-------------|----------------------|--------------------|-----|-------------------------------|---|---------------------------------------------------------------------------------------------------------------------------------------------------------------------------------------------------------|
| 2017-Balar-Lancet                  | 1<br>0<br>5 | 1<br>1<br>9 | Urothelial carcinoma | GU cancer          | 119 | 1200 mg Q3W                   | 1 | Sepsis                                                                                                                                                                                                  |
| 2018-Emens-JAMA Oncol              | 1<br>1<br>0 | 1<br>1<br>6 | Breast cancer        | Other cancer       | 116 | 15 or 20 mg/kg or 2000 mg Q3W | 2 | Pulmonary hypertension (n=1), cause not specified (n=1)                                                                                                                                                 |
| 2018-Powles-Lancet                 | 1<br>1<br>5 | 4<br>5<br>9 | Urothelial carcinoma | GU cancer          | 459 | 1200 mg Q3W                   | 4 | General physical health deterioration (n=1), respiratory failure (n=1), intestinal perforation (n=1), toxic epidermal necrolysis (n=1)                                                                  |
| <b>Avelumab</b>                    |             |             |                      |                    |     |                               |   |                                                                                                                                                                                                         |
| 2017-Gulley-Lancet Oncol           | 1<br>1<br>8 | 1<br>8<br>4 | NSCLC                | Lung cancer        | 184 | 10 mg/kg Q2W                  | 1 | Radiation pneumonitis                                                                                                                                                                                   |
| 2018-Dirix-Breast Cancer Res Treat | 1<br>2<br>3 | 1<br>6<br>8 | Breast cancer        | Other cancer       | 168 | 10 mg/kg Q2W                  | 2 | Acute hepatic failure (n=1), respiratory distress (n=1)                                                                                                                                                 |
| <b>Durvalumab</b>                  |             |             |                      |                    |     |                               |   |                                                                                                                                                                                                         |
| 2017-Antonia-N Engl J Med          | 1<br>2<br>6 | 4<br>7<br>5 | NSCLC                | Lung cancer        | 475 | 10 mg/kg Q2W                  | 7 | Pneumonitis (n=4), cardiomyopathy (n=1), right ventricular failure (n=1), respiratory distress (n=1), respiratory failure (n=1), brain natriuretic peptide increased (n=1), radiation pneumonitis (n=1) |
| 2017-Powles-JAMA Oncol             | 1<br>2<br>7 | 9<br>7<br>0 | Solid cancer         | Mixed cancer types | 970 | 10 mg/kg Q2W                  | 4 | Pneumonia in the setting of pneumonitis (n=1), autoimmune hepatitis and pneumonitis (n=1), and immune thrombocytopenic purpura (n=1)                                                                    |

AE: adverse event; NSCLC: non-small cell lung cancer; SCLC: small cell lung cancer; RCC: renal cell carcinoma; TNBC: triple-negative breast cancer; GI: gastrointestinal; GU: genitourinary; Q2W: every 2 weeks; Q3W: every 3 weeks; ARDS: acute respiratory distress syndrome.

# eFigure 1. Incidences of All Adverse Events

## A. Incidences of All-grade Adverse Events

All-grade AEs

Incidence [95% CI]

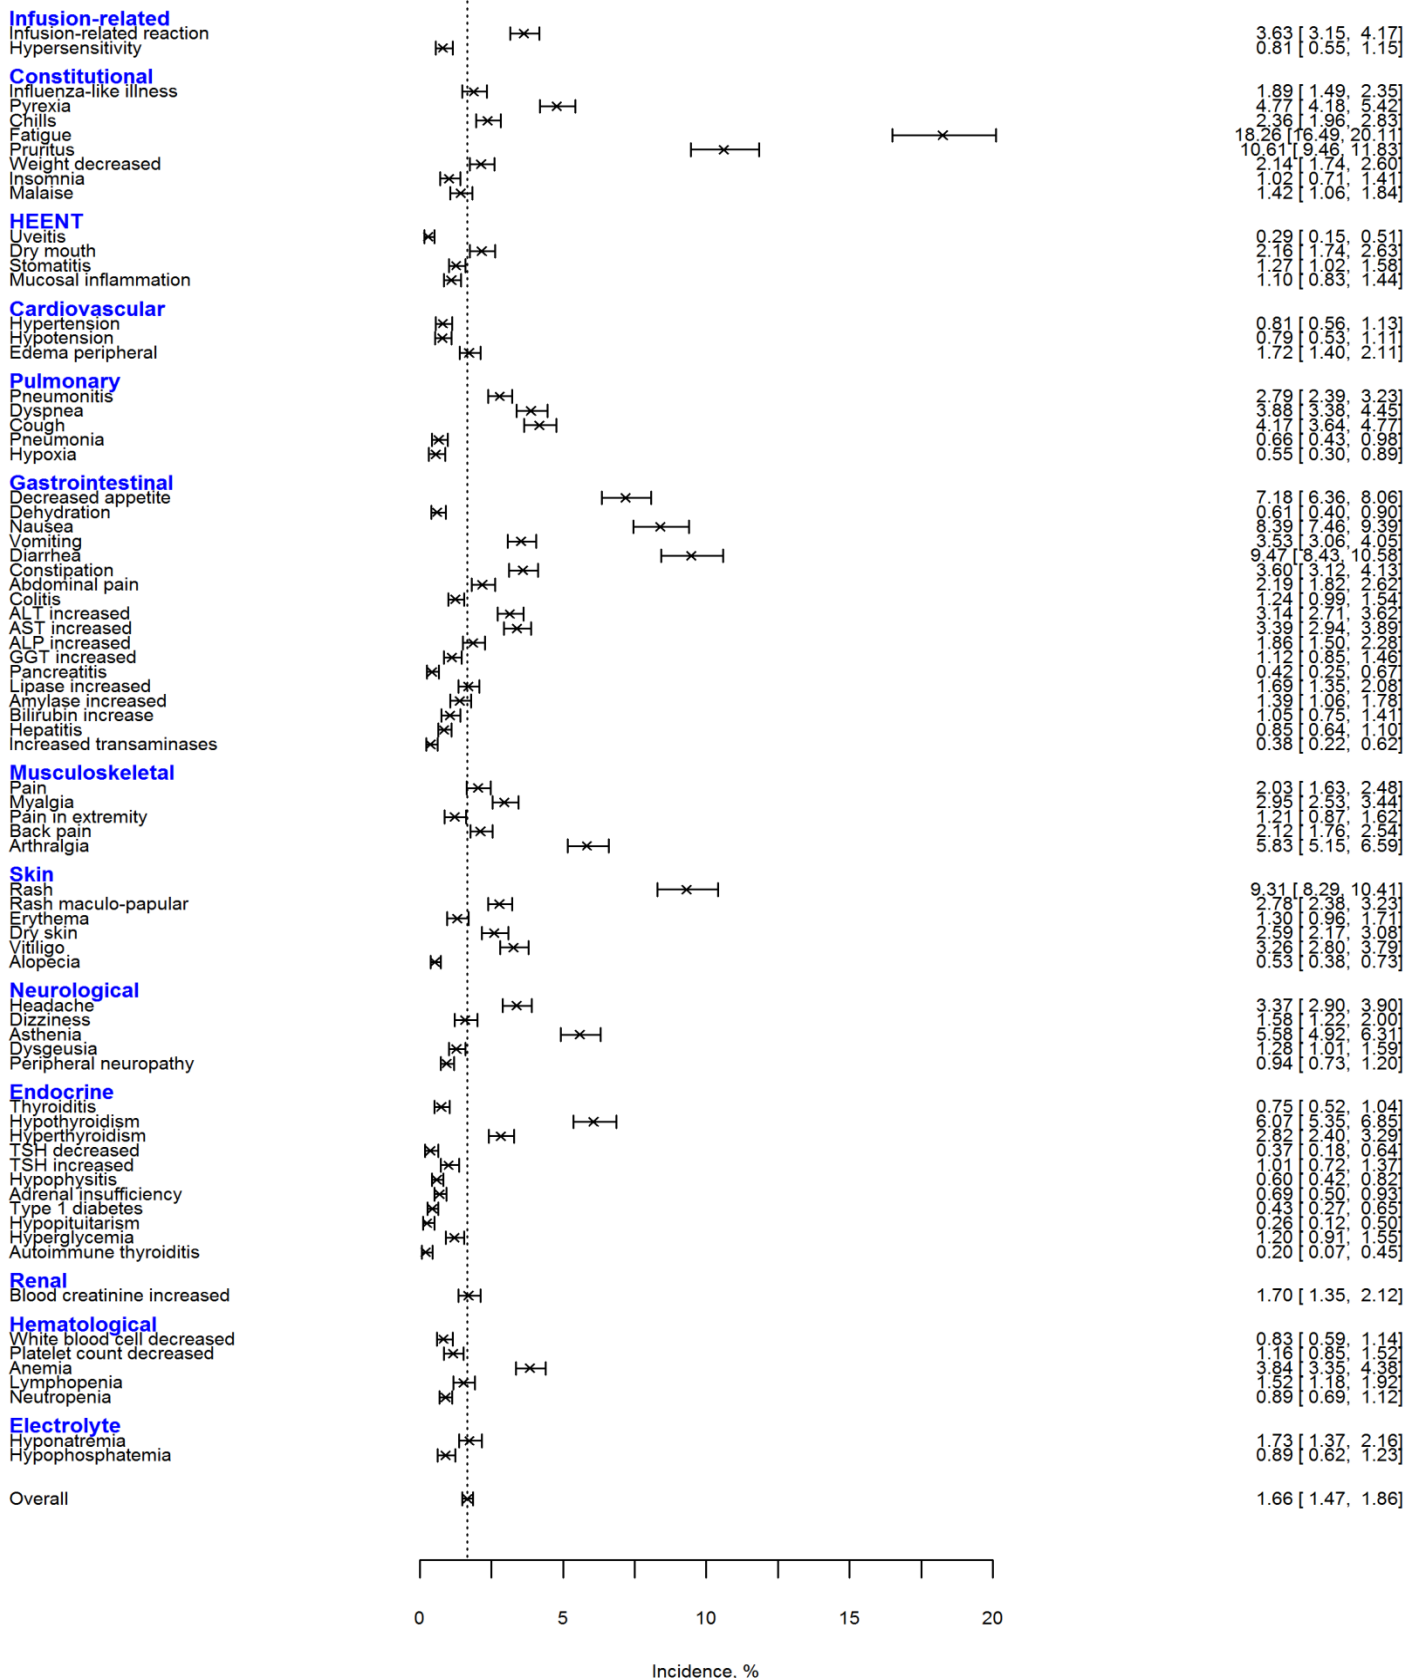

## B. Incidences of Grade 3 or Higher Adverse Events

Grade 3 and above AEs

Incidence [95% CI]

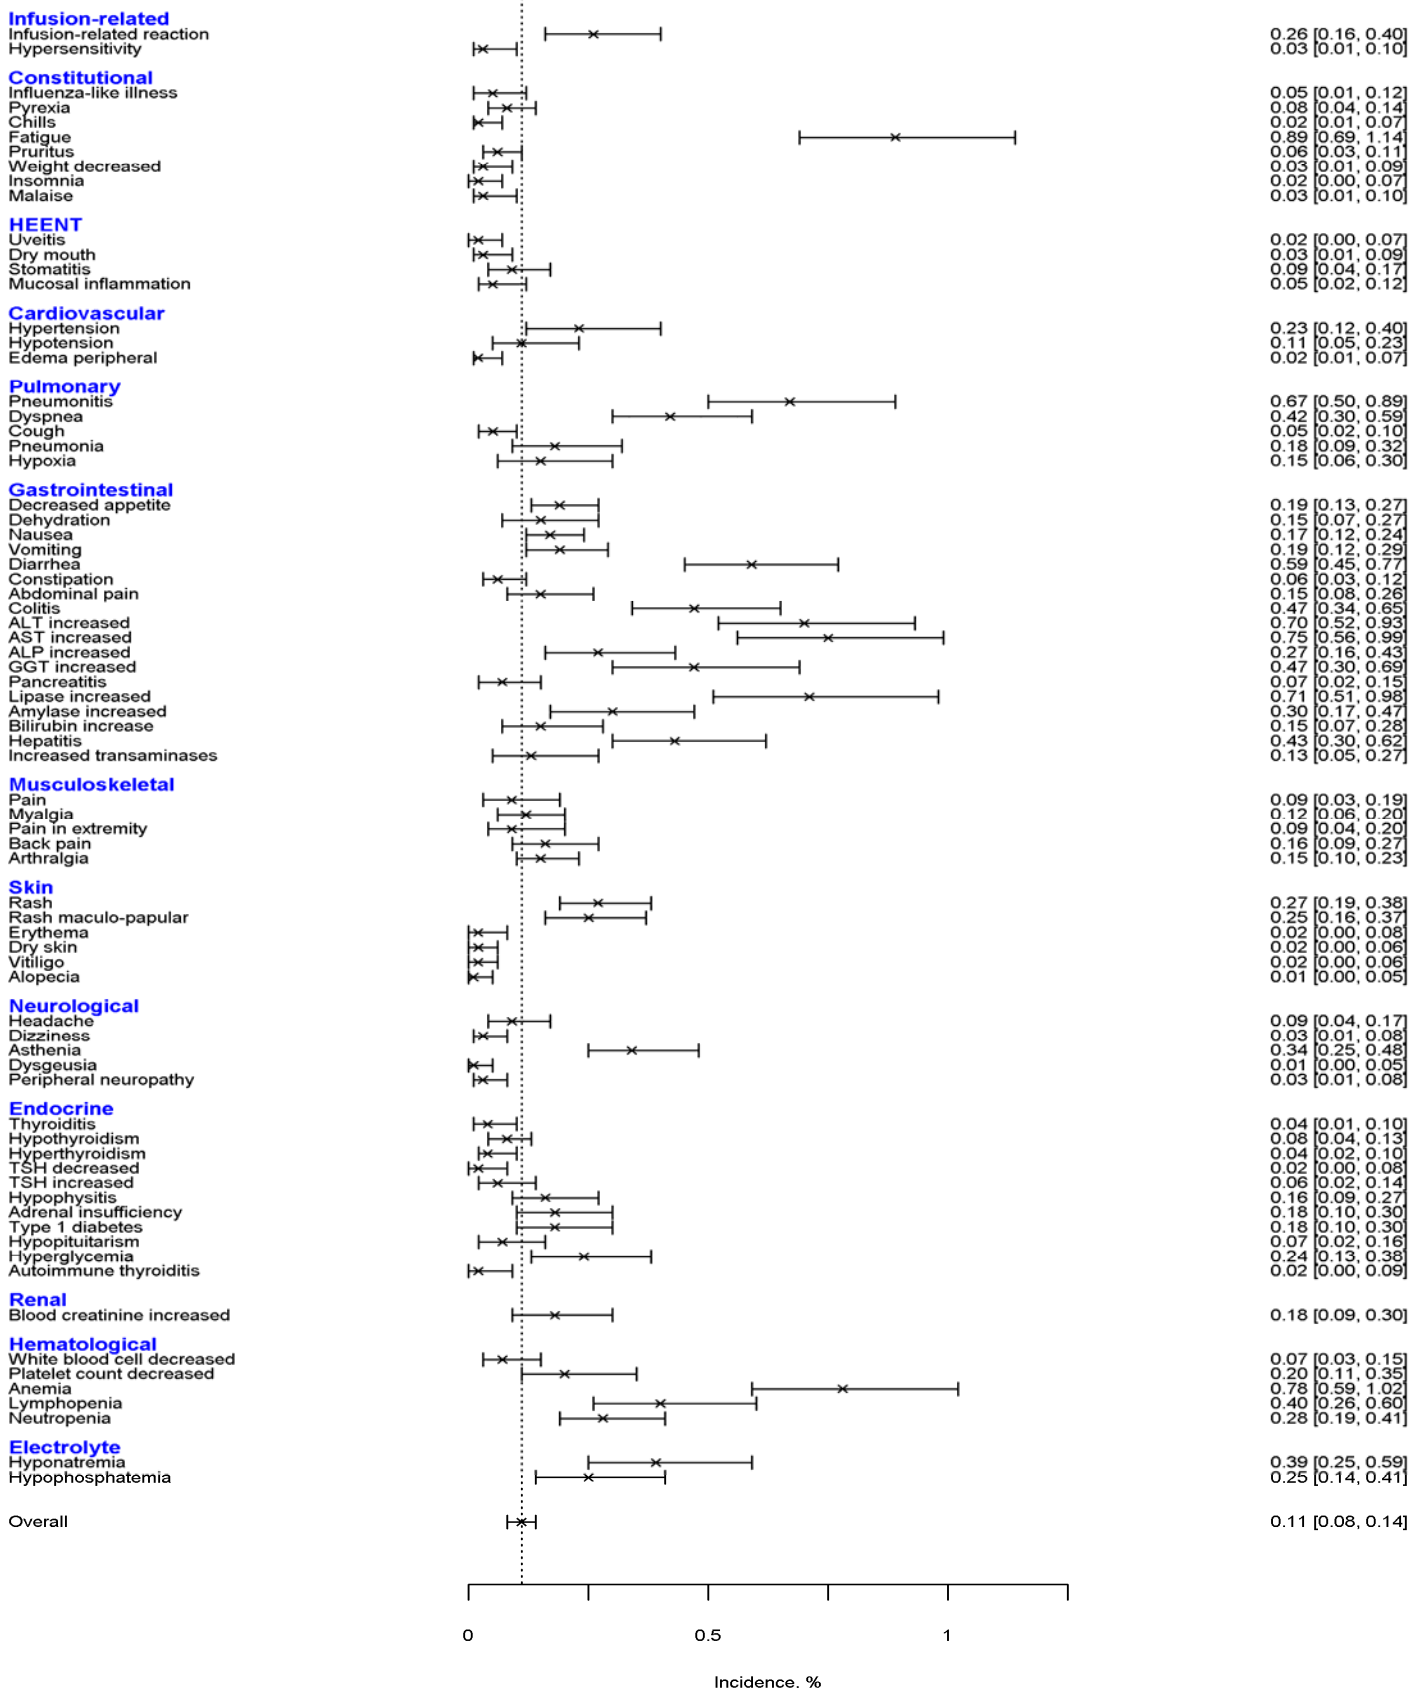

# eFigure 2. Mean Incidences of Adverse Events by Study

## A. Mean Incidences of All-grade Adverse Events by Study

All-grade AEs

Incidence [95% CI]

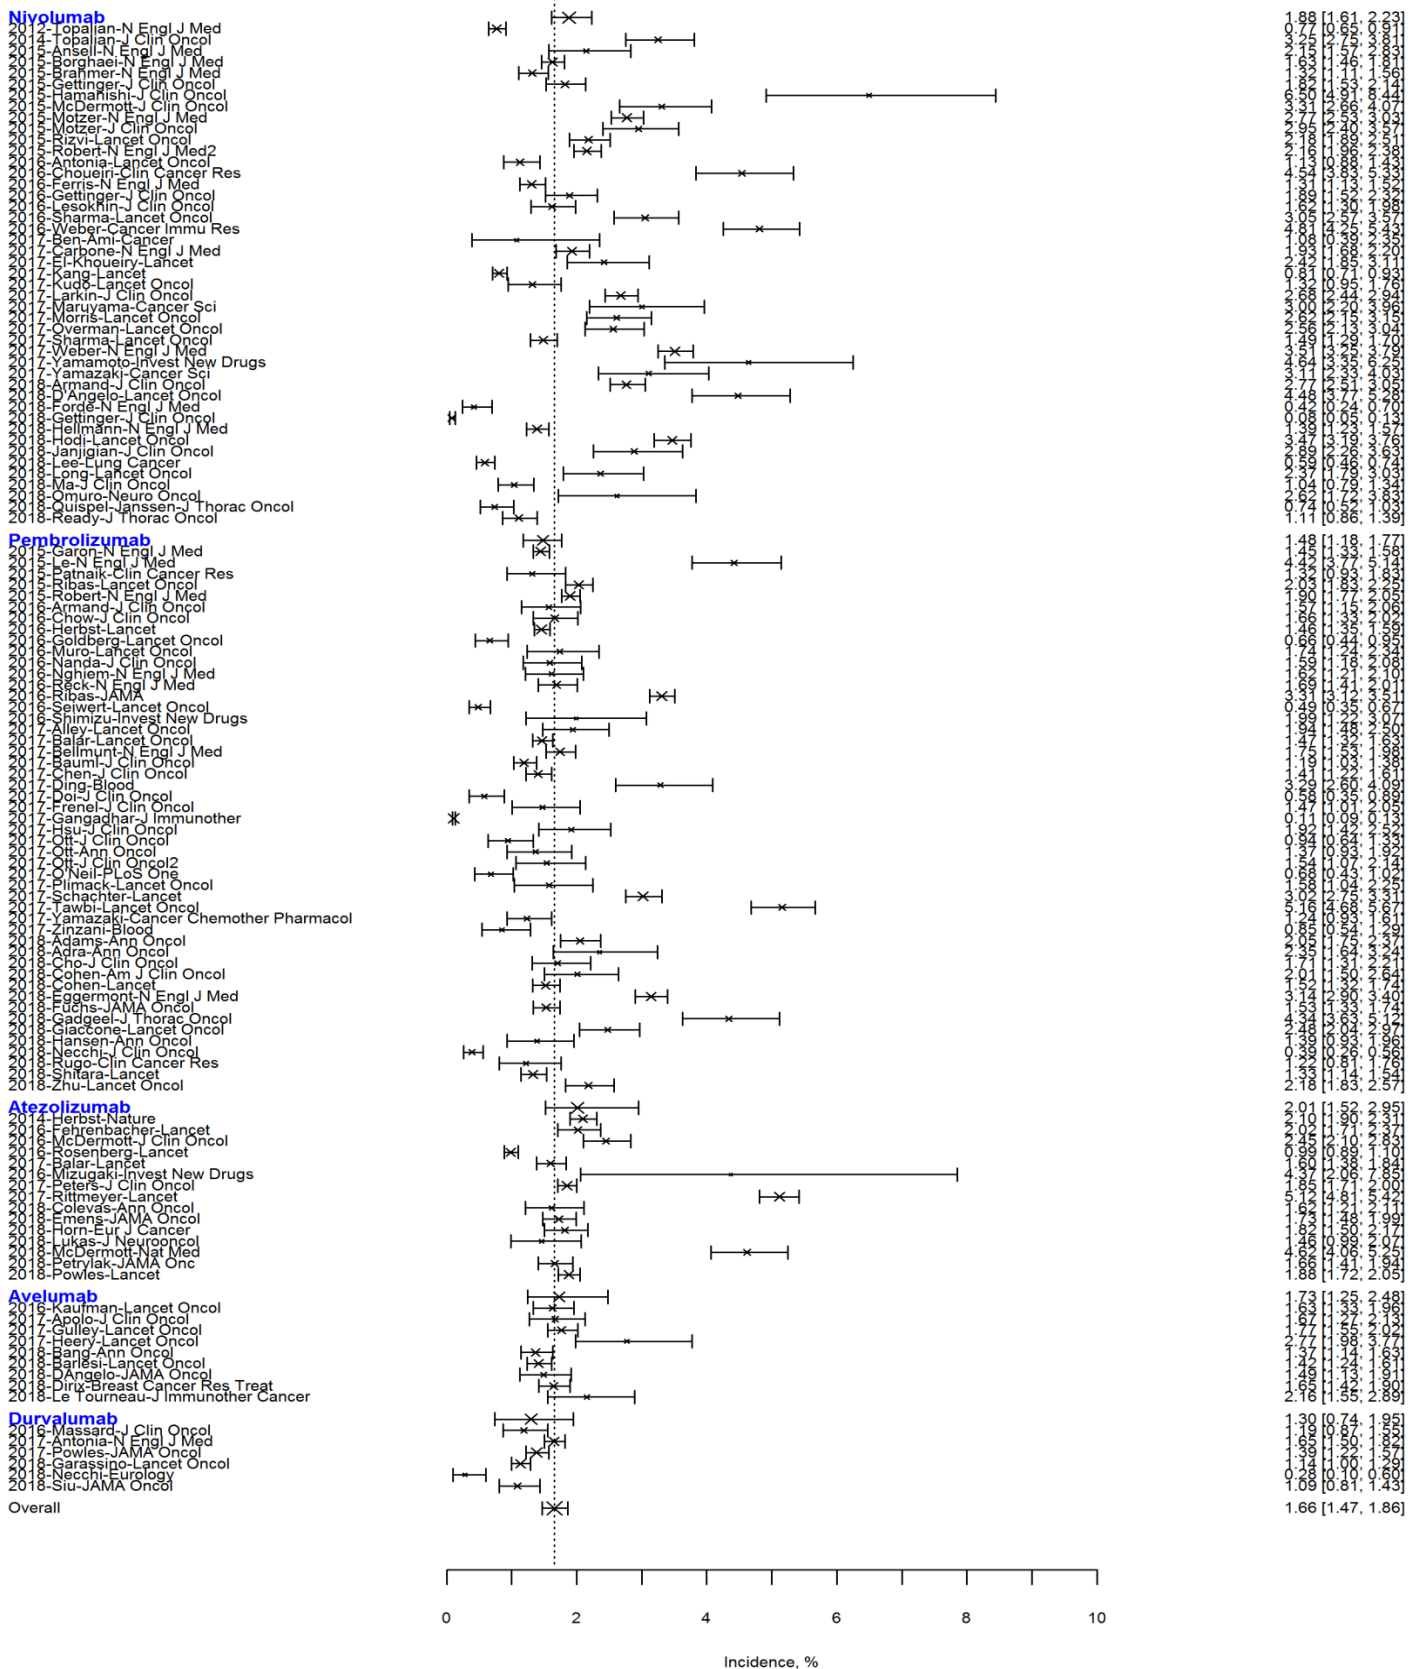

## B. Mean Incidences of Grade 3 or Higher Adverse Events by Study

Grade 3 and above AEs

Incidence [95% CI]

### Nivolumab

Brannmer-J Clin Oncol  
 Lobianco-J Clin Oncol  
 Soballe-J Clin Oncol  
 Yamazaki-Lancet Oncol  
 Brannmer-N Engl J Med  
 Gettinger-J Clin Oncol  
 Vaidyanathan-J Clin Oncol  
 McDermott-J Clin Oncol  
 Wolzner-J Clin Oncol  
 Rizvi-Lancet Oncol  
 Robert-N Engl J Med  
 Antonia-Lancet Oncol  
 Khoury Clin Cancer Res  
 Ferris-N Engl J Med  
 Lesokhin-J Clin Oncol  
 Sharma-Lancet Oncol  
 Ribera-Lancet Oncol  
 Re-Amer Cancer Res  
 Carbone-N Engl J Med  
 Khoury-Lancet  
 Kudo-Lancet Oncol  
 Varkin-J Clin Oncol  
 Waruya-Lancet Oncol  
 Morris-Lancet Oncol  
 Overman-Lancet Oncol  
 Sharma-Lancet Oncol  
 Weber-N Engl J Med  
 Yamamoto-Invest New Drugs  
 Armand-J Clin Oncol  
 D'Angelo-Lancet Oncol  
 Lowery-Lancet Oncol  
 Leung-Engl J Med  
 Hellmann-N Engl J Med  
 Rodriguez-Lancet Oncol  
 Langhahn-J Clin Oncol  
 Lee-Lung Cancer  
 Long-Lancet Oncol  
 Vignani-Lancet Oncol  
 Omuro-Neuro Oncol  
 Quispel-Janssen-J Thorac Oncol  
 Ready-J Thorac Oncol

### Pembrolizumab

Le-N Engl J Med  
 Patnaik-J Clin Cancer Res  
 Robert-N Engl J Med  
 Armand-J Clin Oncol  
 Lowery-Lancet Oncol  
 Goldberg-Lancet Oncol  
 Wuro-Lancet Oncol  
 Nghiem-N Engl J Med  
 Seck-N Engl J Med  
 Siewert-Lancet Oncol  
 Shimizu-Invest New Drugs  
 Alley-Lancet Oncol  
 Hellmunt-N Engl J Med  
 Nishimura-J Clin Oncol  
 Ding-Blood  
 Loriot-Lancet Oncol  
 Shenel-J Clin Oncol  
 Gangadhar-J Immunother  
 Chau-J Clin Oncol  
 Ott-Ann Oncol  
 Ott-Neu Oncol  
 Jimack-Lancet Oncol  
 Schachter-Lancet  
 Lawler-Lancet Oncol  
 Yamazaki-Cancer Chemother Pharmacol  
 Kinzani-Blood  
 Adra-Ann Oncol  
 Cho-J Clin Oncol  
 Cohen-Amer Cancer Res  
 Gggermont-N Engl J Med  
 Gadgeel-J Thorac Oncol  
 Giaccone-Lancet Oncol  
 Jansen-Ann Oncol  
 Lecchi-J Clin Oncol  
 Lugo-Clin Cancer Res  
 Jhara-Lancet  
 Zhu-Lancet Oncol

### Atezolizumab

Berbst-Nature  
 Schrenbacher-Lancet  
 McDermott-J Clin Oncol  
 Rosenber-Lancet  
 Salar-Lancet  
 Wuzgaki-Invest New Drugs  
 Peters-J Clin Oncol  
 Rittmeyer-Lancet  
 Colevas-Ann Oncol  
 Timens-JAMA Oncol  
 Horn-Lung Cancer  
 Lukas-J Neurooncol  
 McDermott-Nat Med  
 Petrylak-JAMA Oncol  
 Powles-Lancet

### Avelumab

B-Kaufman-Lancet Oncol  
 Apolo-J Clin Oncol  
 Gulley-Lancet Oncol  
 Leery-Lancet Oncol  
 Wang-Ann Oncol  
 D'Angelo-JAMA Oncol  
 Dirix-Breast Cancer Res Treat  
 Le Tourneau-J Immunother Cancer

### Durvalumab

Massard-J Clin Oncol  
 Antonia-N Engl J Med  
 Powles-JAMA Oncol  
 Garassino-Lancet Oncol  
 Necchi-Lancet Oncol  
 Liu-JAMA Oncol

Overall

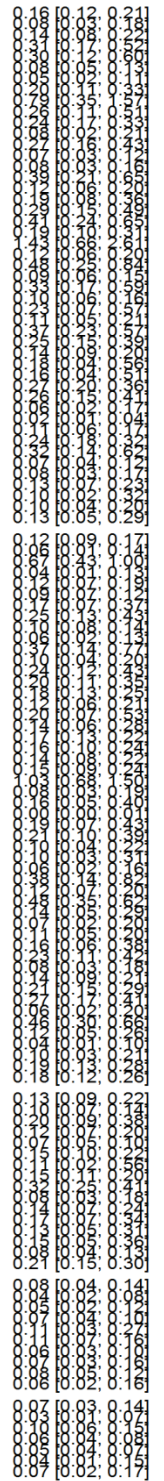

0.11 [0.08, 0.14]

0 1 2 3

Incidence, %

**eFigure 3. Heterogeneity of Adverse Event Incidence in This Meta-Analysis**

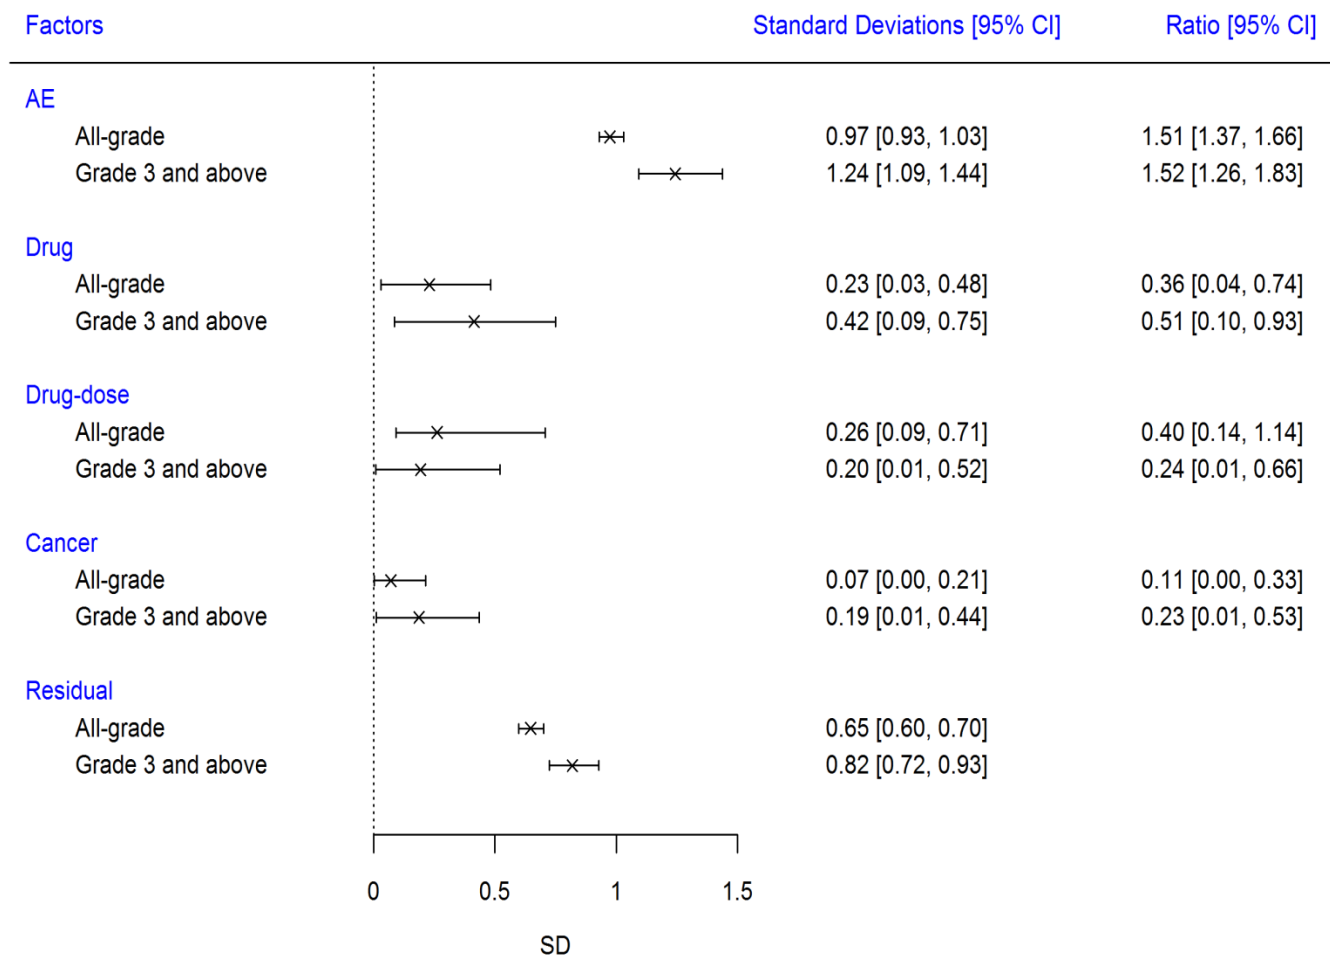



eFigure 4. Mean Incidences of All-grade Adverse Events by Study if Ignoring Missing Data

All-grade AEs

Incidence [95% CI]

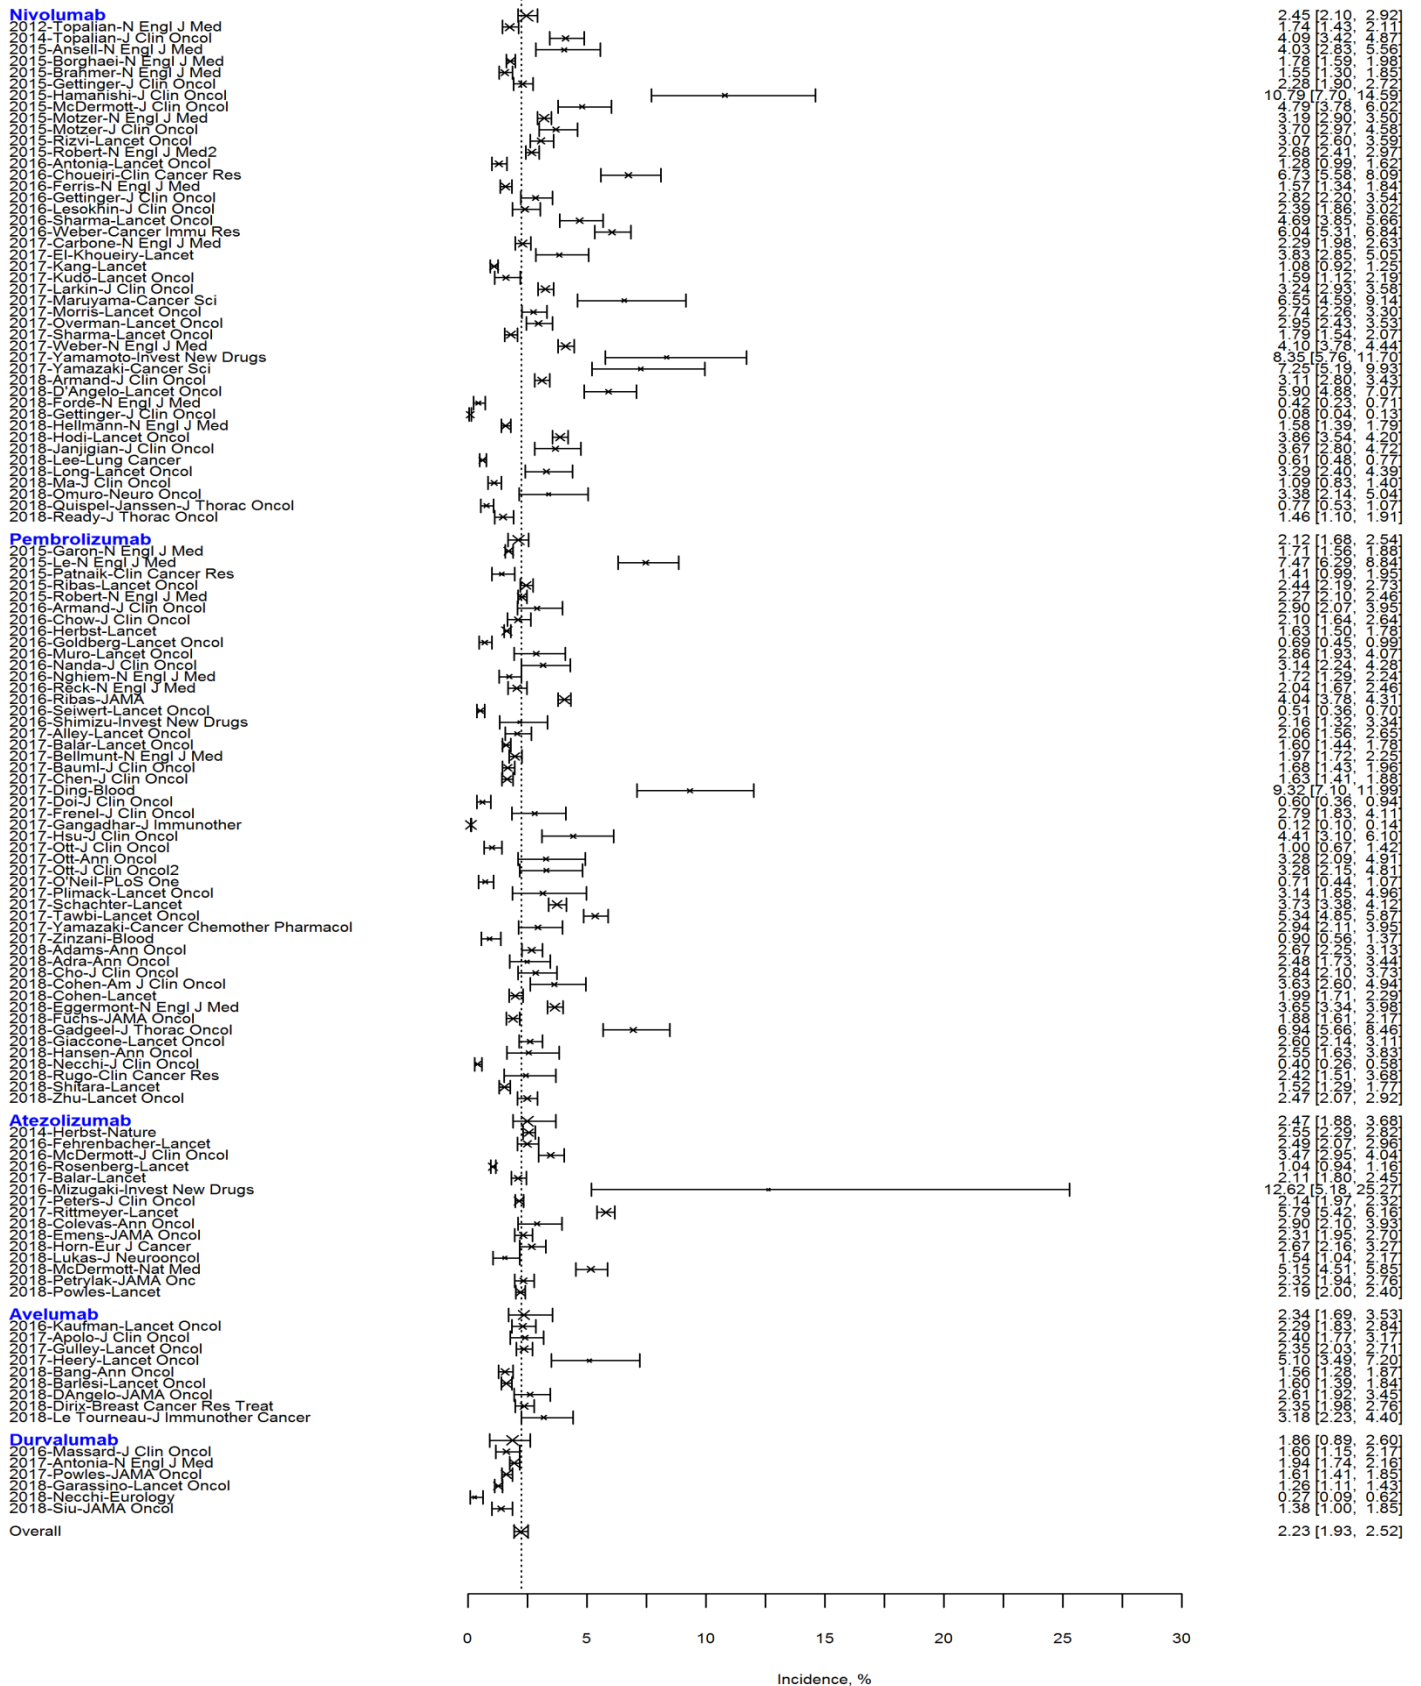

Supplement: jamaoncol-5-1008-s001.pdf [file jamaoncol-5-1008-s001.pdf]
